# Supplementary material for: Examining factors influencing public knowledge and practice of proper face mask usage during the COVID-19 pandemic: a cross-sectional study
Source: PeerJ. 2024 Feb 8;12:e16889. doi: 10.7717/peerj.16889 (PMC10859079; doi:10.7717/peerj.16889)
Supplement: Supplemental Information 1 [file peerj-12-16889-s001.xlsx]

## Sheet: Form Responses 1
Timestamp	ELECTRONIC CONSENT: Clicking on the “Agree” button indicates that, you have read the above information, you voluntarily agree to participate, you are 18 years of age or older• If you disagree NO NEED to fill the survey. الموافقة الالكترونية للمشاركة: عند موافقتك للمشاركة في البحث الرجاء التكرم بالاختيار ب"موافق" للموافقة والاستمرار في عرض الاسئلة, أو "غير موافق" عند عدم الموافقة على المشاركة	Age in years العمر بالسنوات	Gender الجنس	Living status الحالة الاجتماعية	Education التعليم	Occupation الوظيفة	Monthly Income (Saudi Riyal) الدخل الشهري	Current status of your occupation الوضع الحالي للعمل بسبب الجائحة	You or any of your family member tested positive for COVID 19: هل سبق وأن تم اصابتك او احد من العائلة كورونا من قبل؟	Are you working as health care professional? هل تعمل كممارس صحي؟	What kind of face mask do you use? أي من الانواع التالية لاقنعة الوجه تقوم باستخدامها؟	1. Do you wash your hands before start using face mask? هل تقوم بغسل يدك قبل استخدام القناع؟	2. While using face mask, do you uncover any one of the following? Face or chin or nose. عند استخدامك للقناع, هل تقوم بعدم تغطية الوجه او الفك او الانف؟	3. Do you frequently touch the face mask, preferably on the front side? هل تقوم بلمس جانب وجهك الامامي باستمرار خلال لبس الكمامة؟	4. If you are using cloth/fabric mask, do you wash the mask with the detergent when you want to reuse it? اذا كنت تستخدم الكمامة/القناع القماشي, هل تقوم بغسله بالمنظفات او المطهرات قبل اعادة استخدامه؟	If yes to question number 4, how often do you wash your Cloth/Fabric mask?اذا كانت اجابتك للسؤال الرابع ب"نعم", كم مرة تقوم بغسل الكمامة القماشية قبل استخدامها؟	5. Do you wash your hands after removing the face mask? هل تقوم بغسل يديك قبل خلع الكمامة القماشية؟	6. Do you wear a loose mask? هل تقوم بلبس كمامة غير مشدودة/ مرتخية	7. Do you share your mask with others? هل تقوم بمشاركة كمامتك مع الاخرين؟	8. Do you wear a mask under the nose? هل تقوم بوضع كمامتك تحت أنفك؟ ويبقى الانف مكشوفا؟	9. Do you remove mask when you are talking with unknown person?هل تقوم بخلع الكمامة عند التحدث مع شخص لا تعرفه؟	10. Do you remove mask when you are talking with your friends or office colleagues?هل تقوم بخلع الكمامة عند التحدث مع الاقارب او الاصدقاء او الزملاء؟	11. Do you reuse the Medical/Surgical mask? هل تقوم باستخدام الكمامة الجراحية/الطبية أكثر من مرة؟	12. If you use Medical/Surgical mask, do you ensure colored side faces outwards? عند استخدام الكمامة الطبية, هل تتأكد من وجود الجانب الملون للخارج؟	13. Approximately, How long the Medical/Surgical face masks can be used? تقريبا, كم مدة استخدامك للكمامة الطبية او الجراحية؟	14. While you remove your mask, will you touch front side of the mask with your bare hands? عند خلع الكمامة, هل تقوم بملامسة الجانب الامامي من الكمامة بيديك؟	15. Do you use gloves or tissues to remove face mask? هل تستخدم القفاز عند خلع الكمامة؟	16. Do you throw your face mask in an open environment or in open trash bin after its usage? هل تقوم برمي الكمامة بعد استخدامها في مكان عام او في سلة القمامه العادية ؟	17. Do you discard the face mask, if it is wet or damaged? هل تقوم برمي الكمامة اذا وجدتها مبللة او ممزقة؟	18. Do you think improperly discarded face masks has potential health hazards? هل تعتقد ان رمي الكمامات الغير صحيح وفي غير اماكنها المخصصة خطر على الصحة وقد ينقل الفيروس؟	19. Do you think pathogens can survive for long hours in used face masks? هل تعتقد ان الميكروبات تعيش على الكمامات المستخدمة لفترة طويلة؟	20. After usage, do you leave your mask within the reach of others? بعد الانتهاء من استخدام الكمامة, هل تقوم بوضعها في مكان يسهل الوصول اليه؟	21. Do you fold inwards (possibly several folds) and discard your mask to avoid the pathogens being exposed out side? هل تقوم بثني الكمامة مرات عديدة قبل رميها لتجنب انتقال الميكروبات للخارج؟
2020-10-02 13:56:50	Agree موافق	26 - 35	Male ذكر	With family مع عائلة	College/University جامعي	Working يعمل	More than 8000 أكثر من 8000	Work at office/field العمل من المكتب/الميدان	Yes نعم	Yes نعم	Medical/Surgical face mask القناع الطبي/الجراحي	No لا	Yes نعم	No لا	No لا		No لا	No لا	No لا	No لا	No لا	Yes نعم	Yes نعم	Yes نعم	Less than 6 hours أقل من 6 ساعات	No لا	No لا	Yes نعم	Yes نعم	No لا	No لا	Yes نعم	No لا
2020-10-08 13:36:46	Agree موافق	18 - 25	Female انثى	With family مع عائلة	College/University جامعي أو أعلى	Student طالب	Less than 3000 أقل من 3000 ريال	Work from home العمل من المنزل	No لا	No لا	Medical/Surgical face mask القناع الطبي/الجراحي	Sometimes أحيانا	No لا	No لا	Yes نعم	If exposed to a crowded area اذا تعرضت لزحام	Yes نعم	No لا	No لا	Yes نعم	No لا	Yes نعم	No لا	Yes نعم	Less than 6 hours أقل من 6 ساعات	No لا	No لا	Yes نعم	Yes نعم	Yes نعم	Yes	Yes نعم	Yes نعم
2020-10-08 13:37:38	Agree موافق	18 - 25	Female انثى	With family مع عائلة	College/University جامعي أو أعلى	Student طالب	Less than 3000 أقل من 3000 ريال	Work from home العمل من المنزل	No لا	Yes نعم	Cloth or Fabric mask القناع القماشي	Sometimes أحيانا	Yes نعم	No لا	Yes نعم	If exposed to a crowded area اذا تعرضت لزحام	No لا	No لا	No لا	No لا	No لا	No لا	No لا	Yes نعم	Less than 6 hours أقل من 6 ساعات	No لا	No لا	Yes نعم	Yes نعم	Yes نعم	Yes	No لا	Yes نعم
2020-10-08 13:42:32	Agree موافق	18 - 25	Female انثى	With family مع عائلة	College/University جامعي أو أعلى	Student طالب	Less than 3000 أقل من 3000 ريال	Work from home العمل من المنزل	No لا	Yes نعم	Medical/Surgical face mask القناع الطبي/الجراحي	Yes نعم	Yes نعم	No لا	Yes نعم	Everyday كل يوم	Yes نعم	No لا	No لا	No لا	No لا	No لا	No لا	Yes نعم	6 - 8 hours من 6 الى 8 ساعات	No لا	No لا	Yes نعم	Yes نعم	Yes نعم	Yes	No لا	Yes نعم
2020-10-08 13:43:43	Agree موافق	18 - 25	Female انثى	With family مع عائلة	Secondary school ثانوي	Student طالب	More than 8000 أكثر من	Work from home العمل من المنزل	No لا	Yes نعم	Cloth or Fabric mask القناع القماشي	Sometimes أحيانا	Yes نعم	Yes نعم	Yes نعم	Weekly once مرة في الاسبوع	No لا	Yes نعم	No لا	No لا	No لا	Yes نعم	Yes نعم	Yes نعم	Less than 6 hours أقل من 6 ساعات	No لا	No لا	Yes نعم	Yes نعم	Yes نعم	Yes	No لا	No لا
2020-10-08 13:44:25	Agree موافق	18 - 25	Female انثى	With family مع عائلة	College/University جامعي أو أعلى	Student طالب	Less than 3000 أقل من 3000 ريال	Work at office/field العمل من المكتب/الميدان	No لا	No لا	Medical/Surgical face mask القناع الطبي/الجراحي	Sometimes أحيانا	Yes نعم	No لا				No لا	No لا	No لا	No لا	No لا	No لا	Yes نعم	Less than 6 hours أقل من 6 ساعات	No لا	No لا	Yes نعم	Yes نعم	Yes نعم	Yes	Yes نعم	No لا
2020-10-08 13:47:29	Agree موافق	18 - 25	Male ذكر	With family مع عائلة	College/University جامعي أو أعلى	Student طالب	Less than 3000 أقل من 3000 ريال	Work from home العمل من المنزل	No لا	No لا	Medical/Surgical face mask القناع الطبي/الجراحي	No لا	No لا	No لا				No لا	No لا	No لا	No لا	Yes نعم	Yes نعم	Yes نعم	6 - 8 hours من 6 الى 8 ساعات	Yes نعم	No لا	Yes نعم	Yes نعم	Yes نعم	Yes	No لا	No لا
2020-10-08 13:52:13	Agree موافق	18 - 25	Male ذكر	With family مع عائلة	College/University جامعي أو أعلى	Student طالب	Less than 3000 أقل من 3000 ريال	Work from home العمل من المنزل	No لا	Yes نعم	Cloth or Fabric mask القناع القماشي	Sometimes أحيانا	Yes نعم	Yes نعم	No لا	Every alternative day يوم بعد يوم	No لا	No لا	No لا	No لا	No لا	Yes نعم	No لا	Yes نعم	Less than 6 hours أقل من 6 ساعات	Yes نعم	No لا	Yes نعم	No لا	Yes نعم	Yes	Yes نعم	Yes نعم
2020-10-08 13:52:36	Agree موافق	18 - 25	Male ذكر	Alone وحيدا	College/University جامعي أو أعلى	Student طالب	Less than 3000 أقل من 3000 ريال	Work from home العمل من المنزل	No لا	Yes نعم	Medical/Surgical face mask القناع الطبي/الجراحي	No لا	Yes نعم	Yes نعم				No لا	No لا	No لا	No لا	Yes نعم	Yes نعم	Yes نعم	Less than 6 hours أقل من 6 ساعات	No لا	No لا	Yes نعم	Yes نعم	No لا	Yes	Yes نعم	No لا
2020-10-08 13:54:25	Agree موافق	18 - 25	Female انثى	With family مع عائلة	College/University جامعي أو أعلى	Student طالب	Less than 3000 أقل من 3000 ريال		No لا	No لا	Cloth or Fabric mask القناع القماشي	No لا	No لا	No لا	No لا		No لا	No لا	No لا	No لا	No لا	No لا	No لا	Yes نعم	Less than 6 hours أقل من 6 ساعات	No لا	No لا	No لا	Yes نعم	Yes نعم	No لا	No لا	No لا
2020-10-08 13:55:08	Agree موافق	18 - 25	Female انثى	With family مع عائلة	College/University جامعي أو أعلى	Student طالب	Less than 3000 أقل من 3000 ريال	Work from home العمل من المنزل	Yes نعم	No لا	Cloth or Fabric mask القناع القماشي	Sometimes أحيانا	Yes نعم	No لا	Yes نعم	Everyday كل يوم	No لا	No لا	No لا	Yes نعم	No لا	Yes نعم	Yes نعم	No لا	6 - 8 hours من 6 الى 8 ساعات	Yes نعم	No لا	No لا	Yes نعم	Yes نعم	Yes	No لا	No لا
2020-10-08 13:57:45	Agree موافق	18 - 25	Female انثى	With family مع عائلة	College/University جامعي أو أعلى	Student طالب	Less than 3000 أقل من 3000 ريال	Work from home العمل من المنزل	Yes نعم	No لا	Medical/Surgical face mask القناع الطبي/الجراحي	Yes نعم	Yes نعم	No لا				Yes نعم	No لا	Yes نعم	No لا	Yes نعم	No لا	Yes نعم	Less than 6 hours أقل من 6 ساعات	No لا	No لا	Yes نعم	Yes نعم	Yes نعم	Yes	No لا	No لا
2020-10-08 14:04:21	Agree موافق	18 - 25	Male ذكر	With family مع عائلة	College/University جامعي أو أعلى	Student طالب	Less than 3000 أقل من 3000 ريال	Work from home العمل من المنزل	No لا	Yes نعم	Medical/Surgical face mask القناع الطبي/الجراحي	No لا	Yes نعم	Yes نعم	No لا		No لا	Yes نعم	No لا	No لا	No لا	Yes نعم	Yes نعم	Yes نعم	6 - 8 hours من 6 الى 8 ساعات	No لا	No لا	Yes نعم	Yes نعم	Yes نعم	Yes	No لا	Yes نعم
2020-10-08 14:05:24	Agree موافق	18 - 25	Female انثى	With family مع عائلة	College/University جامعي أو أعلى	Student طالب	More than 8000 أكثر من	Work at office/field العمل من المكتب/الميدان	Yes نعم	Yes نعم	Medical/Surgical face mask القناع الطبي/الجراحي	Yes نعم	Yes نعم	Yes نعم	Yes نعم	Everyday كل يوم	No لا	Yes نعم	No لا	No لا	No لا	No لا	Yes نعم	Yes نعم	6 - 8 hours من 6 الى 8 ساعات	No لا	Yes نعم	Yes نعم	Yes نعم	Yes نعم	Yes	No لا	No لا
2020-10-08 14:11:03	Agree موافق	18 - 25	Male ذكر	With family مع عائلة	College/University جامعي أو أعلى	Student طالب	Less than 3000 أقل من 3000 ريال	Work from home العمل من المنزل	No لا	No لا	Medical/Surgical face mask القناع الطبي/الجراحي	Sometimes أحيانا	Yes نعم	Yes نعم	Yes نعم	If exposed to a crowded area اذا تعرضت لزحام	No لا	No لا	No لا	Yes نعم	No لا	Yes نعم	Yes نعم	Yes نعم	Less than 6 hours أقل من 6 ساعات	No لا	No لا	Yes نعم	Yes نعم	Yes نعم	Yes	Yes نعم	No لا
2020-10-08 14:39:31	Agree موافق	18 - 25	Female انثى	With family مع عائلة	College/University جامعي أو أعلى	Not working لا يعمل	Less than 3000 أقل من 3000 ريال		No لا	No لا	Medical/Surgical face mask القناع الطبي/الجراحي	Sometimes أحيانا	No لا	No لا				No لا	No لا	No لا	No لا	No لا	No لا	Yes نعم	Less than 6 hours أقل من 6 ساعات	No لا	No لا	Yes نعم	Yes نعم	Yes نعم	No لا	No لا	No لا
2020-10-08 14:47:02	Agree موافق	18 - 25	Male ذكر	With family مع عائلة	College/University جامعي أو أعلى	Student طالب	Less than 3000 أقل من 3000 ريال	Work from home العمل من المنزل	No لا	No لا	Medical/Surgical face mask القناع الطبي/الجراحي	Sometimes أحيانا	No لا	Yes نعم	No لا		Yes نعم	No لا	No لا	Yes نعم	No لا	Yes نعم	Yes نعم	Yes نعم	24 hours ل24 ساعة	Yes نعم	No لا	No لا	Yes نعم	Yes نعم	No لا	Yes نعم	No لا
2020-10-08 17:22:04	Agree موافق	18 - 25	Female انثى	Alone وحيدا	College/University جامعي أو أعلى	Student طالب	Less than 3000 أقل من 3000 ريال	Work at office/field العمل من المكتب/الميدان	No لا	Yes نعم	Medical/Surgical face mask القناع الطبي/الجراحي	Sometimes أحيانا	No لا	No لا	Yes نعم	Everyday كل يوم	Yes نعم	No لا	No لا	No لا	No لا	No لا	Yes نعم	Yes نعم	Less than 6 hours أقل من 6 ساعات	No لا	No لا	Yes نعم	Yes نعم	No لا	Yes	No لا	Yes نعم
2020-10-08 17:54:57	Agree موافق	18 - 25	Female انثى	With family مع عائلة	College/University جامعي أو أعلى	Student طالب	Less than 3000 أقل من 3000 ريال	Work at office/field العمل من المكتب/الميدان	No لا	Yes نعم	Medical/Surgical face mask القناع الطبي/الجراحي	Yes نعم	Yes نعم	No لا			No لا	No لا	No لا	No لا	No لا	No لا	No لا	Yes نعم	8 - 12 hours من 8 الى 12 ساعة	No لا	No لا	No لا	Yes نعم	Yes نعم	Yes	No لا	Yes نعم
2020-10-08 17:57:32	Agree موافق	18 - 25	Female انثى	With family مع عائلة	College/University جامعي أو أعلى	Student طالب	Less than 3000 أقل من 3000 ريال	Work at office/field العمل من المكتب/الميدان	Yes نعم	Yes نعم	Medical/Surgical face mask القناع الطبي/الجراحي	Sometimes أحيانا	No لا	No لا	Yes نعم	If exposed to a crowded area اذا تعرضت لزحام	Yes نعم	No لا	No لا	No لا	No لا	No لا	No لا	Yes نعم	Less than 6 hours أقل من 6 ساعات	No لا	No لا	No لا	Yes نعم	Yes نعم	Yes	No لا	No لا
2020-10-08 17:58:41	Agree موافق	26 - 35	Female انثى	With family مع عائلة	College/University جامعي أو أعلى	Home maker ربة منزل	Less than 3000 أقل من 3000 ريال	Work from home العمل من المنزل	Yes نعم	No لا	Cloth or Fabric mask القناع القماشي	Sometimes أحيانا	No لا	Yes نعم	Yes نعم	If exposed to a crowded area اذا تعرضت لزحام	No لا	No لا	No لا	No لا	No لا	Yes نعم	No لا	Yes نعم	Less than 6 hours أقل من 6 ساعات	Yes نعم	No لا	Yes نعم	Yes نعم	Yes نعم	No لا	Yes نعم	Yes نعم
2020-10-08 18:07:29	Agree موافق	More than 50 أكثر من 50 سنة	Female انثى	With family مع عائلة	Secondary school ثانوي	Home maker ربة منزل	3000-6000	Work from home العمل من المنزل	Yes نعم	No لا	N 95 mask قناع N 95 الطبي	Yes نعم	Yes نعم	No لا						Yes نعم	No لا	No لا	No لا	Yes نعم	Less than 6 hours أقل من 6 ساعات	No لا	No لا	Yes نعم	Yes نعم	Yes نعم	No لا	Yes نعم	Yes نعم
2020-10-08 18:10:11	Agree موافق	More than 50 أكثر من 50 سنة	Male ذكر	With family مع عائلة	College/University جامعي أو أعلى	Working يعمل	More than 8000 أكثر من	Work at office/field العمل من المكتب/الميدان	Yes نعم	No لا	Medical/Surgical face mask القناع الطبي/الجراحي	No لا	No لا	No لا	No لا			No لا	No لا	No لا	No لا	No لا	Yes نعم	Yes نعم	6 - 8 hours من 6 الى 8 ساعات	No لا	No لا	No لا	Yes نعم	Yes نعم	Yes	No لا	No لا
2020-10-08 18:21:57	Agree موافق	18 - 25	Female انثى	With family مع عائلة	College/University جامعي أو أعلى	Student طالب	Less than 3000 أقل من 3000 ريال	Work from home العمل من المنزل	Yes نعم	No لا	Medical/Surgical face mask القناع الطبي/الجراحي	Yes نعم	Yes نعم	No لا				Yes نعم	No لا	Yes نعم	No لا	Yes نعم	No لا	Yes نعم	Less than 6 hours أقل من 6 ساعات	No لا	No لا	Yes نعم	Yes نعم	Yes نعم	Yes	No لا	No لا
2020-10-08 18:26:48	Agree موافق	More than 50 أكثر من 50 سنة	Female انثى	With family مع عائلة	College/University جامعي أو أعلى	Not working لا يعمل	More than 8000 أكثر من	Work from home العمل من المنزل	Yes نعم	No لا	Medical/Surgical face mask القناع الطبي/الجراحي	No لا	Yes نعم	Yes نعم	No لا	If exposed to a crowded area اذا تعرضت لزحام	No لا	Yes نعم	No لا	No لا	No لا	Yes نعم	Yes نعم		Less than 6 hours أقل من 6 ساعات	Yes نعم	No لا	No لا	Yes نعم	Yes نعم	Yes	No لا	No لا
2020-10-08 18:27:29	Agree موافق	More than 50 أكثر من 50 سنة	Male ذكر	With family مع عائلة	College/University جامعي أو أعلى	Working يعمل	More than 8000 أكثر من	Work at office/field العمل من المكتب/الميدان	Yes نعم	Yes نعم	Medical/Surgical face mask القناع الطبي/الجراحي	Sometimes أحيانا	Yes نعم	No لا	Yes نعم	Everyday كل يوم	No لا	No لا	No لا	No لا	No لا	No لا	No لا	Yes نعم	Less than 6 hours أقل من 6 ساعات	No لا	No لا	Yes نعم	No لا	Yes نعم	No لا	No لا	No لا
2020-10-08 18:32:41	Agree موافق	26 - 35	Female انثى	With family مع عائلة	College/University جامعي أو أعلى	Home maker ربة منزل	More than 8000 أكثر من	Work at office/field العمل من المكتب/الميدان	Yes نعم	No لا	Medical/Surgical face mask القناع الطبي/الجراحي	No لا	No لا	Yes نعم				No لا	No لا	No لا	No لا	Yes نعم	Yes نعم	Yes نعم	Less than 6 hours أقل من 6 ساعات	Yes نعم	No لا	Yes نعم	Yes نعم	Yes نعم	Yes	No لا	Yes نعم
2020-10-08 18:36:43	Agree موافق	18 - 25	Female انثى	With family مع عائلة	College/University جامعي أو أعلى	Student طالب	More than 8000 أكثر من	Work at office/field العمل من المكتب/الميدان	Yes نعم	Yes نعم	Medical/Surgical face mask القناع الطبي/الجراحي	Yes نعم	No لا	No لا			No لا	No لا	No لا	No لا	No لا	Yes نعم	No لا	Yes نعم	6 - 8 hours من 6 الى 8 ساعات	Yes نعم	No لا	Yes نعم	Yes نعم	Yes نعم	Yes	No لا	No لا
2020-10-08 19:14:13	Agree موافق	18 - 25	Female انثى	With family مع عائلة	College/University جامعي أو أعلى	Student طالب	Less than 3000 أقل من 3000 ريال	Work from home العمل من المنزل	Yes نعم	No لا	Medical/Surgical face mask القناع الطبي/الجراحي	Sometimes أحيانا	Yes نعم	No لا				No لا	No لا	No لا	No لا	Yes نعم	No لا	Yes نعم	Less than 6 hours أقل من 6 ساعات	Yes نعم	Yes نعم	No لا	Yes نعم	Yes نعم	No لا	No لا	No لا
2020-10-08 19:14:41	Agree موافق	36 - 45	Male ذكر	With family مع عائلة	College/University جامعي أو أعلى	Working يعمل	More than 8000 أكثر من	Work from home العمل من المنزل	Yes نعم	No لا	Medical/Surgical face mask القناع الطبي/الجراحي	No لا	No لا	No لا	No لا		No لا	No لا	No لا	No لا	No لا	Yes نعم	Yes نعم	Yes نعم	24 hours ل24 ساعة	Yes نعم	No لا	Yes نعم	Yes نعم	Yes نعم	Yes	Yes نعم	Yes نعم
2020-10-08 19:41:25	Agree موافق	18 - 25	Female انثى	Alone وحيدا	College/University جامعي أو أعلى	Student طالب	Less than 3000 أقل من 3000 ريال	Work at office/field العمل من المكتب/الميدان	No لا	Yes نعم	Medical/Surgical face mask القناع الطبي/الجراحي	No لا	No لا	Yes نعم	Yes نعم	Every alternative day يوم بعد يوم	Yes نعم	No لا	No لا	No لا	No لا	Yes نعم	Yes نعم	Yes نعم	Less than 6 hours أقل من 6 ساعات	No لا	No لا	Yes نعم	Yes نعم	Yes نعم	No لا	Yes نعم	No لا
2020-10-08 19:57:02	Agree موافق	18 - 25	Female انثى	With family مع عائلة	College/University جامعي أو أعلى	Student طالب			Yes نعم	No لا	Medical/Surgical face mask القناع الطبي/الجراحي	No لا	No لا	No لا	Yes نعم	Everyday كل يوم	Yes نعم	Yes نعم	No لا	No لا	No لا	Yes نعم	No لا	No لا		No لا	No لا	Yes نعم	Yes نعم	Yes نعم	Yes	No لا	No لا
2020-10-08 20:11:44	Agree موافق	18 - 25	Male ذكر	With family مع عائلة	College/University جامعي أو أعلى	Student طالب	Less than 3000 أقل من 3000 ريال	Work from home العمل من المنزل	No لا	Yes نعم	Medical/Surgical face mask القناع الطبي/الجراحي	No لا	No لا	Yes نعم				No لا	No لا	No لا	No لا	No لا	Yes نعم		Less than 6 hours أقل من 6 ساعات	Yes نعم	No لا	Yes نعم	Yes نعم	Yes نعم	Yes	Yes نعم	Yes نعم
2020-10-08 20:48:48	Agree موافق	18 - 25	Female انثى	With family مع عائلة	College/University جامعي أو أعلى	Student طالب	More than 8000 أكثر من	Work at office/field العمل من المكتب/الميدان	Yes نعم	Yes نعم	Medical/Surgical face mask القناع الطبي/الجراحي	Yes نعم	No لا	No لا			No لا	No لا	No لا	No لا	No لا	Yes نعم	No لا	Yes نعم	6 - 8 hours من 6 الى 8 ساعات	Yes نعم	No لا	Yes نعم	Yes نعم	Yes نعم	Yes	No لا	No لا
2020-10-08 20:59:18	Agree موافق	26 - 35	Female انثى	With family مع عائلة	College/University جامعي أو أعلى	Home maker ربة منزل	Less than 3000 أقل من 3000 ريال	Work from home العمل من المنزل	Yes نعم	No لا	Cloth or Fabric mask القناع القماشي	Sometimes أحيانا	No لا	Yes نعم	Yes نعم	If exposed to a crowded area اذا تعرضت لزحام	No لا	No لا	No لا	No لا	No لا	Yes نعم	No لا	Yes نعم	Less than 6 hours أقل من 6 ساعات	Yes نعم	No لا	Yes نعم	Yes نعم	Yes نعم	No لا	Yes نعم	Yes نعم
2020-10-08 21:20:13	Agree موافق	18 - 25	Male ذكر	With family مع عائلة	College/University جامعي أو أعلى	Student طالب	Less than 3000 أقل من 3000 ريال	Work from home العمل من المنزل	No لا	Yes نعم	Medical/Surgical face mask القناع الطبي/الجراحي	No لا	Yes نعم	Yes نعم	No لا		No لا	Yes نعم	No لا	No لا	No لا	Yes نعم	Yes نعم	Yes نعم	6 - 8 hours من 6 الى 8 ساعات	No لا	No لا	Yes نعم	Yes نعم	Yes نعم	Yes	No لا	Yes نعم
2020-10-08 21:22:59	Agree موافق	More than 50 أكثر من 50 سنة	Female انثى	With family مع عائلة	College/University جامعي أو أعلى	Not working لا يعمل	More than 8000 أكثر من		Yes نعم	No لا	Medical/Surgical face mask القناع الطبي/الجراحي	Yes نعم	No لا	No لا	Yes نعم	Everyday كل يوم	Yes نعم	No لا	No لا	No لا	No لا	Yes نعم	No لا	Yes نعم	Less than 6 hours أقل من 6 ساعات	No لا	No لا	Yes نعم	Yes نعم	Yes نعم	Yes	No لا	No لا
2020-10-08 21:51:15	Agree موافق	26 - 35	Female انثى	With family مع عائلة	College/University جامعي أو أعلى	Home maker ربة منزل	Less than 3000 أقل من 3000 ريال	Work from home العمل من المنزل	Yes نعم	No لا	Cloth or Fabric mask القناع القماشي	Sometimes أحيانا	Yes نعم	Yes نعم	No لا	Every alternative day يوم بعد يوم	No لا	Yes نعم	Yes نعم	Yes نعم	No لا	Yes نعم	Yes نعم	No لا	Less than 6 hours أقل من 6 ساعات	Yes نعم	No لا	Yes نعم	Yes نعم	Yes نعم	No لا	Yes نعم	Yes نعم
2020-10-08 22:08:32	Agree موافق	18 - 25	Female انثى	With family مع عائلة	College/University جامعي أو أعلى	Student طالب			Yes نعم	No لا	Medical/Surgical face mask القناع الطبي/الجراحي	No لا	No لا	No لا	Yes نعم	Everyday كل يوم	Yes نعم	Yes نعم	No لا	No لا	No لا	Yes نعم	No لا	No لا		No لا	No لا	Yes نعم	Yes نعم	Yes نعم	Yes	No لا	No لا
2020-10-08 22:36:18	Agree موافق	18 - 25	Female انثى	With family مع عائلة	College/University جامعي أو أعلى	Student طالب	Less than 3000 أقل من 3000 ريال	Work from home العمل من المنزل	No لا	Yes نعم	Cloth or Fabric mask القناع القماشي	Sometimes أحيانا	Yes نعم	No لا	Yes نعم	If exposed to a crowded area اذا تعرضت لزحام	No لا	No لا	No لا	No لا	No لا	No لا	No لا	Yes نعم	Less than 6 hours أقل من 6 ساعات	No لا	No لا	Yes نعم	Yes نعم	Yes نعم	Yes	No لا	Yes نعم
2020-10-08 22:39:35	Agree موافق	18 - 25	Female انثى	Alone وحيدا	College/University جامعي أو أعلى	Student طالب	Less than 3000 أقل من 3000 ريال	Work at office/field العمل من المكتب/الميدان	No لا	Yes نعم	Medical/Surgical face mask القناع الطبي/الجراحي	No لا	No لا	Yes نعم	Yes نعم	Every alternative day يوم بعد يوم	Yes نعم	No لا	No لا	No لا	No لا	Yes نعم	Yes نعم	Yes نعم	Less than 6 hours أقل من 6 ساعات	No لا	No لا	Yes نعم	Yes نعم	Yes نعم	No لا	Yes نعم	No لا
2020-10-08 23:32:13	Agree موافق	18 - 25	Female انثى	With family مع عائلة	College/University جامعي أو أعلى	Working يعمل	Less than 3000 أقل من 3000 ريال	Work at office/field العمل من المكتب/الميدان	No لا	Yes نعم	Medical/Surgical face mask القناع الطبي/الجراحي	Sometimes أحيانا	No لا	Yes نعم	No لا		No لا	No لا	No لا	No لا	No لا	No لا	No لا	No لا	Less than 6 hours أقل من 6 ساعات	No لا	No لا	No لا	Yes نعم	Yes نعم	Yes	No لا	Yes نعم
2020-10-09 00:05:40	Agree موافق	36 - 45	Female انثى	With family مع عائلة	College/University جامعي أو أعلى	Working يعمل	More than 8000 أكثر من	Work from home العمل من المنزل	Yes نعم	No لا	Medical/Surgical face mask القناع الطبي/الجراحي	Yes نعم	No لا	No لا	Yes نعم	Weekly once مرة في الاسبوع	No لا	No لا	No لا	No لا	No لا	Yes نعم	No لا	No لا	Less than 6 hours أقل من 6 ساعات	No لا	No لا	Yes نعم	Yes نعم	No لا	Yes	No لا	No لا
2020-10-09 00:41:10	Agree موافق	26 - 35	Female انثى	With family مع عائلة	College/University جامعي أو أعلى	Student طالب	Less than 3000 أقل من 3000 ريال	Work from home العمل من المنزل	No لا	No لا	Cloth or Fabric mask القناع القماشي	Sometimes أحيانا	Yes نعم	No لا	Yes نعم	Weekly once مرة في الاسبوع	No لا	No لا	No لا	No لا	No لا	No لا	No لا	Yes نعم	Less than 6 hours أقل من 6 ساعات	Yes نعم	No لا	Yes نعم	Yes نعم	Yes نعم	No لا	No لا	Yes نعم
2020-10-09 01:31:00	Agree موافق	18 - 25	Male ذكر	With family مع عائلة	College/University جامعي أو أعلى	Student طالب	Less than 3000 أقل من 3000 ريال	Work from home العمل من المنزل	No لا	No لا	Medical/Surgical face mask القناع الطبي/الجراحي	Sometimes أحيانا	Yes نعم	Yes نعم	Yes نعم	If exposed to a crowded area اذا تعرضت لزحام	No لا	No لا	No لا	Yes نعم	No لا	Yes نعم	Yes نعم	Yes نعم	Less than 6 hours أقل من 6 ساعات	No لا	No لا	Yes نعم	Yes نعم	Yes نعم	Yes	Yes نعم	No لا
2020-10-09 02:39:16	Agree موافق	18 - 25	Female انثى	With family مع عائلة	College/University جامعي أو أعلى	Student طالب	Less than 3000 أقل من 3000 ريال	Work from home العمل من المنزل	No لا	No لا	Cloth or Fabric mask القناع القماشي	Yes نعم	Yes نعم	Yes نعم	Yes نعم	If exposed to a crowded area اذا تعرضت لزحام	Yes نعم	No لا	No لا	Yes نعم	No لا	No لا	No لا	Yes نعم	Less than 6 hours أقل من 6 ساعات	Yes نعم	No لا	Yes نعم	Yes نعم	No لا	No لا	Yes نعم	Yes نعم
2020-10-09 07:58:53	Agree موافق	18 - 25	Male ذكر	With family مع عائلة	College/University جامعي أو أعلى	Student طالب	Less than 3000 أقل من 3000 ريال	Work from home العمل من المنزل	No لا	No لا	Medical/Surgical face mask القناع الطبي/الجراحي	No لا	No لا	No لا				No لا	No لا	No لا	No لا	Yes نعم	Yes نعم	Yes نعم	6 - 8 hours من 6 الى 8 ساعات	Yes نعم	No لا	Yes نعم	Yes نعم	Yes نعم	Yes	No لا	No لا
2020-10-09 14:51:51	Agree موافق	26 - 35	Female انثى	With family مع عائلة	College/University جامعي أو أعلى	Home maker ربة منزل	Less than 3000 أقل من 3000 ريال	Work from home العمل من المنزل	Yes نعم	No لا	N 95 mask قناع N 95 الطبي	Sometimes أحيانا	Yes نعم	Yes نعم	Yes نعم	Weekly once مرة في الاسبوع	No لا	No لا	No لا	Yes نعم	No لا	Yes نعم	No لا	Yes نعم	Less than 6 hours أقل من 6 ساعات	Yes نعم	No لا	Yes نعم	Yes نعم	Yes نعم	Yes	Yes نعم	Yes نعم
2020-10-09 17:39:04	Agree موافق	18 - 25	Male ذكر	With family مع عائلة	College/University جامعي أو أعلى	Student طالب	Less than 3000 أقل من 3000 ريال	Work from home العمل من المنزل	No لا	No لا	Medical/Surgical face mask القناع الطبي/الجراحي	No لا	No لا	No لا				No لا	No لا	No لا	No لا	Yes نعم	Yes نعم	Yes نعم	6 - 8 hours من 6 الى 8 ساعات	Yes نعم	No لا	Yes نعم	Yes نعم	Yes نعم	Yes	No لا	No لا
2020-10-09 18:17:28	Agree موافق	18 - 25	Female انثى	With family مع عائلة	College/University جامعي أو أعلى	Student طالب	Less than 3000 أقل من 3000 ريال	Work from home العمل من المنزل	No لا	Yes نعم	Medical/Surgical face mask القناع الطبي/الجراحي	Yes نعم	Yes نعم	Yes نعم			Yes نعم	No لا	No لا	No لا	No لا	No لا	No لا	Yes نعم	Less than 6 hours أقل من 6 ساعات	No لا	No لا	No لا	Yes نعم	Yes نعم	Yes	Yes نعم	No لا
2020-10-09 18:28:14	Agree موافق	26 - 35	Female انثى	With family مع عائلة	College/University جامعي أو أعلى	Home maker ربة منزل	Less than 3000 أقل من 3000 ريال	Work from home العمل من المنزل	Yes نعم	No لا	N 95 mask قناع N 95 الطبي	Sometimes أحيانا	Yes نعم	Yes نعم	Yes نعم	Weekly once مرة في الاسبوع	No لا	No لا	No لا	Yes نعم	No لا	Yes نعم	No لا	Yes نعم	Less than 6 hours أقل من 6 ساعات	Yes نعم	No لا	Yes نعم	Yes نعم	Yes نعم	Yes	Yes نعم	Yes نعم
2020-10-09 18:45:48	Agree موافق	18 - 25	Female انثى	With family مع عائلة	College/University جامعي أو أعلى	Student طالب	Less than 3000 أقل من 3000 ريال	Work from home العمل من المنزل	Yes نعم	No لا	Cloth or Fabric mask القناع القماشي	Sometimes أحيانا	Yes نعم	No لا	Yes نعم	Everyday كل يوم	No لا	No لا	No لا	Yes نعم	No لا	Yes نعم	Yes نعم	No لا	6 - 8 hours من 6 الى 8 ساعات	Yes نعم	No لا	No لا	Yes نعم	Yes نعم	Yes	No لا	No لا
2020-10-09 19:23:47	Agree موافق	18 - 25	Male ذكر	With family مع عائلة	College/University جامعي أو أعلى	Student طالب	Less than 3000 أقل من 3000 ريال	Work from home العمل من المنزل	No لا	Yes نعم	Cloth or Fabric mask القناع القماشي	Sometimes أحيانا	Yes نعم	Yes نعم	No لا	Every alternative day يوم بعد يوم	No لا	No لا	No لا	No لا	No لا	Yes نعم	No لا	Yes نعم	Less than 6 hours أقل من 6 ساعات	Yes نعم	No لا	Yes نعم	No لا	Yes نعم	Yes	Yes نعم	Yes نعم
2020-10-09 21:20:11	Agree موافق	18 - 25	Male ذكر	With family مع عائلة	College/University جامعي أو أعلى	Student طالب	Less than 3000 أقل من 3000 ريال	Work at office/field العمل من المكتب/الميدان	No لا	No لا	N 95 mask قناع N 95 الطبي	No لا	No لا	Yes نعم	No لا	Weekly once مرة في الاسبوع	No لا	No لا	No لا	No لا	No لا	Yes نعم	Yes نعم	Yes نعم	6 - 8 hours من 6 الى 8 ساعات	No لا	No لا	Yes نعم	Yes نعم	Yes نعم	Yes	Yes نعم	No لا
2020-10-09 21:20:36	Agree موافق	36 - 45	Female انثى	With family مع عائلة	College/University جامعي أو أعلى	Working يعمل	More than 8000 أكثر من	Work at office/field العمل من المكتب/الميدان	Yes نعم	No لا	Medical/Surgical face mask القناع الطبي/الجراحي	No لا	No لا	No لا	Yes نعم	If exposed to a crowded area اذا تعرضت لزحام	No لا	Yes نعم	No لا	No لا	No لا	Yes نعم	Yes نعم	Yes نعم	Less than 6 hours أقل من 6 ساعات	Yes نعم	No لا	Yes نعم	Yes نعم	No لا	No لا	Yes نعم	No لا
2020-10-09 21:22:22	Agree موافق	18 - 25	Male ذكر	With family مع عائلة	College/University جامعي أو أعلى	Student طالب	Less than 3000 أقل من 3000 ريال	Work at office/field العمل من المكتب/الميدان	Yes نعم	Yes نعم	Medical/Surgical face mask القناع الطبي/الجراحي	Yes نعم	Yes نعم	No لا	No لا	Weekly once مرة في الاسبوع	No لا	No لا	No لا	No لا	No لا	No لا	No لا	No لا	6 - 8 hours من 6 الى 8 ساعات	Yes نعم	Yes نعم	Yes نعم	Yes نعم	Yes نعم	Yes	Yes نعم	Yes نعم
2020-10-09 21:30:07	Agree موافق	18 - 25	Male ذكر	With family مع عائلة	College/University جامعي أو أعلى	Student طالب	Less than 3000 أقل من 3000 ريال	Work from home العمل من المنزل	No لا	No لا	Cloth or Fabric mask القناع القماشي	No لا	No لا	No لا	No لا		Yes نعم	Yes نعم	No لا	No لا	No لا	No لا	Yes نعم	Yes نعم	Less than 6 hours أقل من 6 ساعات	Yes نعم	No لا	Yes نعم	Yes نعم	No لا	Yes	Yes نعم	No لا
2020-10-09 21:30:21	Agree موافق	18 - 25	Male ذكر	With family مع عائلة	College/University جامعي أو أعلى	Student طالب	Less than 3000 أقل من 3000 ريال	Work from home العمل من المنزل	Yes نعم	No لا	Cloth or Fabric mask القناع القماشي	Sometimes أحيانا	No لا	Yes نعم	Yes نعم	Every alternative day يوم بعد يوم	Yes نعم	No لا	No لا	No لا	No لا	No لا	Yes نعم	Yes نعم	Less than 6 hours أقل من 6 ساعات	No لا	No لا	Yes نعم	Yes نعم	Yes نعم	Yes	No لا	Yes نعم
2020-10-09 21:33:15	Agree موافق	18 - 25	Male ذكر	Alone وحيدا	College/University جامعي أو أعلى	Student طالب	Less than 3000 أقل من 3000 ريال	Work from home العمل من المنزل	No لا	No لا	Medical/Surgical face mask القناع الطبي/الجراحي	Sometimes أحيانا	No لا	No لا	No لا		No لا	No لا	No لا	No لا	No لا	Yes نعم	Yes نعم	Yes نعم	Less than 6 hours أقل من 6 ساعات	No لا	No لا	No لا	Yes نعم	Yes نعم	No لا	No لا	No لا
2020-10-09 21:33:20	Agree موافق		Male ذكر	Alone وحيدا	College/University جامعي أو أعلى	Student طالب	Less than 3000 أقل من 3000 ريال	Work at office/field العمل من المكتب/الميدان	Yes نعم	No لا	Cloth or Fabric mask القناع القماشي	Yes نعم	Yes نعم	Yes نعم	Yes نعم	Every alternative day يوم بعد يوم	Yes نعم	Yes نعم	Yes نعم	Yes نعم	Yes نعم	Yes نعم	Yes نعم	Yes نعم	Less than 6 hours أقل من 6 ساعات	Yes نعم	Yes نعم	Yes نعم	Yes نعم	Yes نعم	Yes	Yes نعم	Yes نعم
2020-10-09 21:33:40	Agree موافق	18 - 25	Male ذكر	Alone وحيدا	Secondary school ثانوي	Working يعمل	3000-6000	Work at office/field العمل من المكتب/الميدان	Yes نعم	No لا	Medical/Surgical face mask القناع الطبي/الجراحي	Sometimes أحيانا	No لا	No لا	No لا		No لا	No لا	No لا	Yes نعم	No لا	Yes نعم	No لا	Yes نعم	8 - 12 hours من 8 الى 12 ساعة	Yes نعم	No لا	Yes نعم	Yes نعم	Yes نعم	Yes	No لا	Yes نعم
2020-10-09 21:36:39	Agree موافق	26 - 35	Male ذكر	With family مع عائلة	College/University جامعي أو أعلى	Working يعمل	More than 8000 أكثر من	Work at office/field العمل من المكتب/الميدان	No لا	No لا	Medical/Surgical face mask القناع الطبي/الجراحي	No لا	Yes نعم	No لا	Yes نعم	Weekly once مرة في الاسبوع	No لا	No لا	No لا	No لا	No لا	No لا	Yes نعم	Yes نعم	Less than 6 hours أقل من 6 ساعات	Yes نعم	No لا	Yes نعم	Yes نعم	Yes نعم	Yes	Yes نعم	No لا
2020-10-09 21:36:46	Agree موافق	18 - 25	Male ذكر	With family مع عائلة	College/University جامعي أو أعلى	Not working لا يعمل	Less than 3000 أقل من 3000 ريال	Work from home العمل من المنزل	No لا	No لا	Medical/Surgical face mask القناع الطبي/الجراحي	Sometimes أحيانا	No لا	Yes نعم			No لا	No لا	No لا	No لا	No لا	No لا	Yes نعم	Yes نعم	Less than 6 hours أقل من 6 ساعات	No لا	No لا	No لا	Yes نعم	Yes نعم	Yes	Yes نعم	Yes نعم
2020-10-09 21:37:58	Agree موافق	26 - 35	Male ذكر	With family مع عائلة	College/University جامعي أو أعلى	Not working لا يعمل	Less than 3000 أقل من 3000 ريال	Work from home العمل من المنزل	Yes نعم	No لا	Medical/Surgical face mask القناع الطبي/الجراحي	No لا	Yes نعم	Yes نعم	No لا		No لا	No لا	No لا	No لا	No لا	No لا	Yes نعم	No لا	Less than 6 hours أقل من 6 ساعات	Yes نعم	No لا	Yes نعم	Yes نعم	No لا	No لا	No لا	Yes نعم
2020-10-09 21:38:18	Agree موافق	26 - 35	Male ذكر	With family مع عائلة	College/University جامعي أو أعلى	Not working لا يعمل	Less than 3000 أقل من 3000 ريال	Work at office/field العمل من المكتب/الميدان	Yes نعم	No لا	Cloth or Fabric mask القناع القماشي	No لا	Yes نعم	No لا	No لا	If exposed to a crowded area اذا تعرضت لزحام	No لا	No لا	No لا	No لا	No لا	Yes نعم	No لا	Yes نعم	Less than 6 hours أقل من 6 ساعات	No لا	No لا	Yes نعم	Yes نعم	Yes نعم	Yes	No لا	No لا
2020-10-09 21:40:31	Agree موافق	18 - 25	Male ذكر	With family مع عائلة	Secondary school ثانوي	Student طالب	Less than 3000 أقل من 3000 ريال	Work from home العمل من المنزل	Yes نعم	No لا	Medical/Surgical face mask القناع الطبي/الجراحي	Sometimes أحيانا	No لا	Yes نعم	Yes نعم	Every alternative day يوم بعد يوم	No لا	No لا	No لا	No لا	No لا	No لا	Yes نعم	Yes نعم	8 - 12 hours من 8 الى 12 ساعة	Yes نعم	Yes نعم	Yes نعم	No لا	No لا	No لا	No لا	No لا
2020-10-09 21:42:14	Agree موافق	18 - 25	Male ذكر	With family مع عائلة	College/University جامعي أو أعلى	Student طالب	Less than 3000 أقل من 3000 ريال	Work from home العمل من المنزل	No لا	No لا	Medical/Surgical face mask القناع الطبي/الجراحي	Sometimes أحيانا	No لا	Yes نعم	No لا				No لا	Yes نعم	No لا	Yes نعم	Yes نعم	Yes نعم	24 hours ل24 ساعة	No لا	No لا	Yes نعم		No لا	No لا	Yes نعم	No لا
2020-10-09 21:45:07	Agree موافق	18 - 25	Male ذكر	With family مع عائلة	College/University جامعي أو أعلى	Not working لا يعمل			No لا	No لا	N 95 mask قناع N 95 الطبي	No لا	No لا	No لا	No لا	Everyday كل يوم	Yes نعم	No لا	No لا	No لا	No لا	Yes نعم	No لا	No لا	6 - 8 hours من 6 الى 8 ساعات	No لا	No لا	Yes نعم	No لا	Yes نعم	No لا	Yes نعم	Yes نعم
2020-10-09 21:49:36	Agree موافق	18 - 25	Male ذكر	With family مع عائلة	Secondary school ثانوي	Student طالب	Less than 3000 أقل من 3000 ريال	Work from home العمل من المنزل	Yes نعم	No لا	Cloth or Fabric mask القناع القماشي	Yes نعم	Yes نعم	Yes نعم	Yes نعم	Weekly once مرة في الاسبوع	Yes نعم	Yes نعم	No لا	Yes نعم	No لا	No لا	No لا	No لا	8 - 12 hours من 8 الى 12 ساعة	No لا	No لا	No لا	Yes نعم	No لا	No لا	No لا	Yes نعم
2020-10-09 21:51:04	Agree موافق	26 - 35	Male ذكر	With family مع عائلة	College/University جامعي أو أعلى	Not working لا يعمل		Work at office/field العمل من المكتب/الميدان	No لا	No لا	Medical/Surgical face mask القناع الطبي/الجراحي	Yes نعم	Yes نعم	No لا	Yes نعم	Every alternative day يوم بعد يوم	No لا	Yes نعم	No لا	No لا	No لا	No لا	No لا	No لا	Less than 6 hours أقل من 6 ساعات	Yes نعم	Yes نعم	No لا	Yes نعم	Yes نعم	Yes	No لا	Yes نعم
2020-10-09 21:52:15	Agree موافق	26 - 35	Male ذكر	With family مع عائلة	College/University جامعي أو أعلى	Working يعمل	More than 8000 أكثر من	Work at office/field العمل من المكتب/الميدان	No لا	Yes نعم	N 95 mask قناع N 95 الطبي	Sometimes أحيانا	Yes نعم	Yes نعم	No لا	Everyday كل يوم	No لا	Yes نعم	No لا	Yes نعم	Yes نعم	Yes نعم	Yes نعم	Yes نعم	6 - 8 hours من 6 الى 8 ساعات	Yes نعم	No لا	Yes نعم	Yes نعم	Yes نعم	Yes	Yes نعم	Yes نعم
2020-10-09 21:52:15	Agree موافق	26 - 35	Male ذكر	With family مع عائلة	College/University جامعي أو أعلى	Working يعمل	6000-8000	Work at office/field العمل من المكتب/الميدان	No لا	No لا	Medical/Surgical face mask القناع الطبي/الجراحي	Sometimes أحيانا	No لا	Yes نعم			Yes نعم	No لا	No لا	No لا	No لا	Yes نعم	Yes نعم	Yes نعم	Less than 6 hours أقل من 6 ساعات	No لا	No لا	No لا	Yes نعم	Yes نعم	Yes	No لا	No لا
2020-10-09 21:54:12	Agree موافق	26 - 35	Male ذكر	With family مع عائلة	College/University جامعي أو أعلى	Working يعمل	More than 8000 أكثر من	Work from home العمل من المنزل	Yes نعم	No لا	Medical/Surgical face mask القناع الطبي/الجراحي	Sometimes أحيانا	No لا	Yes نعم	Yes نعم	Everyday كل يوم	No لا	No لا	No لا	No لا	No لا	Yes نعم	No لا	No لا	6 - 8 hours من 6 الى 8 ساعات	Yes نعم	No لا	Yes نعم	Yes نعم	Yes نعم	Yes	No لا	Yes نعم
2020-10-09 21:54:32	Agree موافق	26 - 35	Male ذكر	Alone وحيدا	College/University جامعي أو أعلى	Student طالب	3000-6000	Work at office/field العمل من المكتب/الميدان	Yes نعم	No لا	Cloth or Fabric mask القناع القماشي	Sometimes أحيانا	No لا	Yes نعم	Yes نعم	Everyday كل يوم	Yes نعم	Yes نعم	No لا	No لا	No لا	No لا	No لا	Yes نعم	6 - 8 hours من 6 الى 8 ساعات	Yes نعم	Yes نعم	No لا	Yes نعم	No لا	No لا	No لا	No لا
2020-10-09 21:55:52	Agree موافق	18 - 25	Male ذكر	With family مع عائلة	Secondary school ثانوي	Working يعمل	More than 8000 أكثر من	Work at office/field العمل من المكتب/الميدان	Yes نعم	No لا	Medical/Surgical face mask القناع الطبي/الجراحي	Sometimes أحيانا	No لا	No لا	Yes نعم	Weekly once مرة في الاسبوع	No لا	Yes نعم	No لا	Yes نعم	Yes نعم	Yes نعم	Yes نعم	Yes نعم	24 hours ل24 ساعة	No لا	No لا	No لا	Yes نعم	Yes نعم	Yes	Yes نعم	Yes نعم
2020-10-09 21:56:04	Agree موافق	45 - 50	Male ذكر	With family مع عائلة	College/University جامعي أو أعلى	Working يعمل	More than 8000 أكثر من	Work at office/field العمل من المكتب/الميدان	Yes نعم	No لا	N 95 mask قناع N 95 الطبي	Sometimes أحيانا	No لا	Yes نعم	Yes نعم	Everyday كل يوم	No لا	No لا	No لا	Yes نعم	No لا	Yes نعم	Yes نعم	Yes نعم	Less than 6 hours أقل من 6 ساعات	No لا	No لا	Yes نعم	Yes نعم	Yes نعم	Yes	Yes نعم	Yes نعم
2020-10-09 21:57:10	Agree موافق	26 - 35	Male ذكر	With family مع عائلة	College/University جامعي أو أعلى	Working يعمل	More than 8000 أكثر من	Work from home العمل من المنزل	Yes نعم	No لا	Medical/Surgical face mask القناع الطبي/الجراحي	No لا	Yes نعم	Yes نعم	No لا	Weekly once مرة في الاسبوع	No لا	No لا	No لا	No لا	No لا	Yes نعم	Yes نعم	Yes نعم	Less than 6 hours أقل من 6 ساعات	Yes نعم	No لا	No لا	Yes نعم	Yes نعم	No لا	Yes نعم	No لا
2020-10-09 21:57:34	Agree موافق	18 - 25	Male ذكر	With family مع عائلة	Secondary school ثانوي	Not working لا يعمل	Less than 3000 أقل من 3000 ريال	Work from home العمل من المنزل	No لا	No لا	Medical/Surgical face mask القناع الطبي/الجراحي	Yes نعم	No لا	No لا	Yes نعم	Everyday كل يوم	Yes نعم	No لا	No لا	No لا		No لا	Yes نعم	Yes نعم	Less than 6 hours أقل من 6 ساعات	No لا	Yes نعم	Yes نعم	Yes نعم	No لا	Yes	Yes نعم	Yes نعم
2020-10-09 21:58:11	Agree موافق	36 - 45	Female انثى	With family مع عائلة	Secondary school ثانوي	Home maker ربة منزل	6000-8000	Work from home العمل من المنزل	No لا	No لا	Cloth or Fabric mask القناع القماشي	Yes نعم	No لا	No لا	Yes نعم	Weekly once مرة في الاسبوع	Yes نعم	Yes نعم	No لا	No لا	No لا	No لا	No لا	Yes نعم	Less than 6 hours أقل من 6 ساعات	No لا	No لا	Yes نعم	Yes نعم	Yes نعم	Yes	Yes نعم	Yes نعم
2020-10-09 22:01:46	Agree موافق	45 - 50	Male ذكر	With family مع عائلة	College/University جامعي أو أعلى	Working يعمل	More than 8000 أكثر من	Work at office/field العمل من المكتب/الميدان	No لا	No لا	N 95 mask قناع N 95 الطبي	Yes نعم	Yes نعم	No لا	No لا	If exposed to a crowded area اذا تعرضت لزحام	Yes نعم	Yes نعم	No لا	No لا	No لا	No لا	Yes نعم	Yes نعم	8 - 12 hours من 8 الى 12 ساعة	Yes نعم	Yes نعم	Yes نعم	Yes نعم	Yes نعم	Yes	Yes نعم	Yes نعم
2020-10-09 22:02:43	Agree موافق	45 - 50	Male ذكر	With family مع عائلة	College/University جامعي أو أعلى	Not working لا يعمل	More than 8000 أكثر من	Work from home العمل من المنزل	Yes نعم	No لا	N 95 mask قناع N 95 الطبي	Sometimes أحيانا	No لا	Yes نعم	No لا		No لا	No لا	No لا	No لا	No لا	Yes نعم	Yes نعم	Yes نعم	24 hours ل24 ساعة	No لا	No لا	Yes نعم	Yes نعم	Yes نعم	Yes	No لا	No لا
2020-10-09 22:02:52	Agree موافق	More than 50 أكثر من 50 سنة	Female انثى	With family مع عائلة	Secondary school ثانوي	Not working لا يعمل	More than 8000 أكثر من		Yes نعم	No لا	Medical/Surgical face mask القناع الطبي/الجراحي	Sometimes أحيانا	No لا	No لا	Yes نعم	Every alternative day يوم بعد يوم	No لا	No لا	No لا	No لا	No لا	No لا	No لا	Yes نعم	6 - 8 hours من 6 الى 8 ساعات	No لا	No لا	No لا	Yes نعم	Yes نعم	Yes	No لا	Yes نعم
2020-10-09 22:03:52	Agree موافق	More than 50 أكثر من 50 سنة	Male ذكر	With family مع عائلة	College/University جامعي أو أعلى	Working يعمل	More than 8000 أكثر من	Work from home العمل من المنزل	No لا	No لا	N 95 mask قناع N 95 الطبي	Yes نعم	No لا	No لا	No لا		Yes نعم	No لا	No لا	No لا	No لا	No لا	Yes نعم	No لا	6 - 8 hours من 6 الى 8 ساعات	No لا	No لا	No لا	Yes نعم	Yes نعم	No لا	No لا	Yes نعم
2020-10-09 22:05:05	Agree موافق	45 - 50	Male ذكر	With family مع عائلة	College/University جامعي أو أعلى	Working يعمل	More than 8000 أكثر من	Work from home العمل من المنزل	No لا	No لا	N 95 mask قناع N 95 الطبي	Yes نعم	No لا	No لا	Yes نعم	Everyday كل يوم	No لا	No لا	No لا	No لا	No لا	No لا	No لا	Yes نعم	6 - 8 hours من 6 الى 8 ساعات	Yes نعم	No لا	Yes نعم	Yes نعم	Yes نعم	Yes	Yes نعم	Yes نعم
2020-10-09 22:05:22	Agree موافق	18 - 25	Male ذكر	With family مع عائلة	College/University جامعي أو أعلى	Student طالب	Less than 3000 أقل من 3000 ريال	Work from home العمل من المنزل	No لا	No لا	Medical/Surgical face mask القناع الطبي/الجراحي	No لا	Yes نعم	Yes نعم	No لا	Weekly once مرة في الاسبوع	Yes نعم	No لا	No لا	No لا	No لا	Yes نعم	No لا	Yes نعم	Less than 6 hours أقل من 6 ساعات	Yes نعم	No لا	Yes نعم	Yes نعم	Yes نعم	Yes	No لا	Yes نعم
2020-10-09 22:05:43	Agree موافق	45 - 50	Male ذكر	With family مع عائلة	College/University جامعي أو أعلى	Working يعمل	Less than 3000 أقل من 3000 ريال	Work at office/field العمل من المكتب/الميدان	No لا	No لا	Medical/Surgical face mask القناع الطبي/الجراحي	Yes نعم	No لا	No لا	Yes نعم	Every alternative day يوم بعد يوم	No لا	No لا	No لا	No لا	No لا	Yes نعم	No لا	Yes نعم	Less than 6 hours أقل من 6 ساعات	No لا	No لا		Yes نعم	Yes نعم	Yes	Yes نعم	Yes نعم
2020-10-09 22:07:25	Agree موافق	18 - 25	Male ذكر	With family مع عائلة	College/University جامعي أو أعلى	Not working لا يعمل	Less than 3000 أقل من 3000 ريال		No لا	No لا	Medical/Surgical face mask القناع الطبي/الجراحي	No لا	No لا	Yes نعم	No لا		No لا	No لا	No لا	No لا	No لا	No لا	Yes نعم	Yes نعم	Less than 6 hours أقل من 6 ساعات	No لا	No لا	No لا	Yes نعم	Yes نعم	No لا	Yes نعم	Yes نعم
2020-10-09 22:08:19	Agree موافق	More than 50 أكثر من 50 سنة	Male ذكر	With family مع عائلة	College/University جامعي أو أعلى	Working يعمل	More than 8000 أكثر من	Work from home العمل من المنزل	No لا	No لا	N 95 mask قناع N 95 الطبي	Sometimes أحيانا	Yes نعم	Yes نعم	No لا		No لا	Yes نعم	No لا	No لا	No لا	Yes نعم	No لا	Yes نعم	Less than 6 hours أقل من 6 ساعات	No لا	No لا	Yes نعم	Yes نعم	Yes نعم	Yes	No لا	No لا
2020-10-09 22:09:07	Agree موافق	More than 50 أكثر من 50 سنة	Male ذكر	With family مع عائلة	Secondary school ثانوي	Not working لا يعمل	More than 8000 أكثر من	Work at office/field العمل من المكتب/الميدان	No لا	No لا	Medical/Surgical face mask القناع الطبي/الجراحي	No لا	No لا	Yes نعم	No لا	Weekly once مرة في الاسبوع	No لا	No لا	No لا	No لا	No لا	Yes نعم	Yes نعم	Yes نعم	Less than 6 hours أقل من 6 ساعات	Yes نعم	No لا	Yes نعم	Yes نعم	Yes نعم	Yes	Yes نعم	Yes نعم
2020-10-09 22:09:57	Agree موافق	26 - 35	Male ذكر	Alone وحيدا	College/University جامعي أو أعلى	Not working لا يعمل	Less than 3000 أقل من 3000 ريال	Work at office/field العمل من المكتب/الميدان	Yes نعم	No لا	Medical/Surgical face mask القناع الطبي/الجراحي	Yes نعم	No لا	Yes نعم	Yes نعم	Everyday كل يوم	No لا	Yes نعم	No لا	Yes نعم	No لا	No لا	Yes نعم	Yes نعم	6 - 8 hours من 6 الى 8 ساعات	No لا	No لا	No لا	Yes نعم	Yes نعم	Yes	No لا	Yes نعم
2020-10-09 22:15:10	Agree موافق	36 - 45	Male ذكر	With family مع عائلة	College/University جامعي أو أعلى	Working يعمل	More than 8000 أكثر من	Work from home العمل من المنزل	No لا	No لا	Cloth or Fabric mask القناع القماشي	No لا	Yes نعم	Yes نعم	No لا		No لا	Yes نعم	Yes نعم	Yes نعم	Yes نعم	Yes نعم	Yes نعم	Yes نعم	Less than 6 hours أقل من 6 ساعات	Yes نعم	No لا	No لا	Yes نعم	Yes نعم	No لا	Yes نعم	No لا
2020-10-09 22:16:47	Agree موافق	18 - 25	Male ذكر	With family مع عائلة	Secondary school ثانوي	Student طالب	Less than 3000 أقل من 3000 ريال	Work from home العمل من المنزل	No لا	No لا	Cloth or Fabric mask القناع القماشي	Yes نعم	No لا	No لا	Yes نعم	Everyday كل يوم	Yes نعم	No لا	No لا	No لا	No لا	No لا	Yes نعم	No لا	8 - 12 hours من 8 الى 12 ساعة	No لا	Yes نعم	Yes نعم	Yes نعم	Yes نعم	No لا	No لا	Yes نعم
2020-10-09 22:16:59	Agree موافق	36 - 45	Male ذكر	With family مع عائلة	College/University جامعي أو أعلى	Working يعمل	More than 8000 أكثر من	Work at office/field العمل من المكتب/الميدان	No لا	No لا	N 95 mask قناع N 95 الطبي	Yes نعم	No لا		Yes نعم	Weekly once مرة في الاسبوع	No لا	Yes نعم	No لا		No لا	Yes نعم	Yes نعم	Yes نعم	24 hours ل24 ساعة	No لا	No لا	Yes نعم	Yes نعم	Yes نعم	Yes	No لا	Yes نعم
2020-10-09 22:19:46	Agree موافق	26 - 35	Male ذكر	With family مع عائلة	Secondary school ثانوي	Working يعمل	3000-6000	Work at office/field العمل من المكتب/الميدان	No لا	No لا	Medical/Surgical face mask القناع الطبي/الجراحي	Yes نعم	No لا	No لا	No لا		Yes نعم	No لا	No لا	No لا	No لا	No لا	No لا	No لا	8 - 12 hours من 8 الى 12 ساعة	No لا	No لا		No لا				Yes نعم
2020-10-09 22:19:53	Agree موافق	26 - 35	Male ذكر	With family مع عائلة	College/University جامعي أو أعلى	Working يعمل	6000-8000	Work at office/field العمل من المكتب/الميدان	No لا	No لا	Medical/Surgical face mask القناع الطبي/الجراحي	No لا	Yes نعم	Yes نعم	No لا		No لا	Yes نعم	No لا	Yes نعم	No لا	Yes نعم	Yes نعم	Yes نعم	24 hours ل24 ساعة	Yes نعم	No لا	Yes نعم	Yes نعم	No لا	No لا	No لا	No لا
2020-10-09 22:22:30	Agree موافق	45 - 50	Male ذكر	With family مع عائلة	Secondary school ثانوي	Working يعمل	More than 8000 أكثر من	Work at office/field العمل من المكتب/الميدان	Yes نعم	No لا	Medical/Surgical face mask القناع الطبي/الجراحي	Sometimes أحيانا	Yes نعم	Yes نعم	Yes نعم	Every alternative day يوم بعد يوم	No لا	No لا	No لا	No لا	No لا	No لا	No لا	Yes نعم	8 - 12 hours من 8 الى 12 ساعة	No لا	No لا	Yes نعم	Yes نعم	Yes نعم	Yes	No لا	Yes نعم
2020-10-09 22:23:53	Agree موافق	26 - 35	Male ذكر	Alone وحيدا	Secondary school ثانوي	Working يعمل	3000-6000	Work at office/field العمل من المكتب/الميدان	Yes نعم	No لا	Medical/Surgical face mask القناع الطبي/الجراحي	Yes نعم	Yes نعم	Yes نعم	Yes نعم	Every alternative day يوم بعد يوم	Yes نعم	Yes نعم	Yes نعم	Yes نعم	Yes نعم	Yes نعم	Yes نعم	Yes نعم	6 - 8 hours من 6 الى 8 ساعات	Yes نعم	Yes نعم	Yes نعم	Yes نعم	Yes نعم	Yes	Yes نعم	Yes نعم
2020-10-09 22:26:05	Agree موافق	36 - 45	Male ذكر	With family مع عائلة	Secondary school ثانوي	Working يعمل	3000-6000	Work at office/field العمل من المكتب/الميدان	Yes نعم	No لا	N 95 mask قناع N 95 الطبي	Sometimes أحيانا	Yes نعم	No لا				No لا	No لا	No لا	No لا	No لا	No لا	Yes نعم	Less than 6 hours أقل من 6 ساعات	No لا	No لا	Yes نعم	Yes نعم	Yes نعم	Yes	No لا	No لا
2020-10-09 22:32:37	Agree موافق	26 - 35	Female انثى	With family مع عائلة	College/University جامعي أو أعلى	Not working لا يعمل			Yes نعم	No لا	N 95 mask قناع N 95 الطبي	Sometimes أحيانا	Yes نعم	No لا			No لا	Yes نعم	No لا	Yes نعم	No لا	Yes نعم	No لا	Yes نعم	Less than 6 hours أقل من 6 ساعات	No لا	No لا	Yes نعم	Yes نعم		Yes	Yes نعم	No لا
2020-10-09 22:36:19	Agree موافق	18 - 25	Male ذكر	With family مع عائلة	College/University جامعي أو أعلى	Working يعمل	3000-6000	Work at office/field العمل من المكتب/الميدان	No لا	No لا	Cloth or Fabric mask القناع القماشي	Yes نعم	No لا	Yes نعم	No لا	If exposed to a crowded area اذا تعرضت لزحام	No لا	Yes نعم	No لا	Yes نعم	No لا	No لا	Yes نعم	No لا	8 - 12 hours من 8 الى 12 ساعة	No لا	Yes نعم	No لا	Yes نعم	No لا	Yes	Yes نعم	Yes نعم
2020-10-09 22:36:45	Agree موافق	More than 50 أكثر من 50 سنة	Male ذكر	With family مع عائلة	College/University جامعي أو أعلى	Working يعمل	More than 8000 أكثر من	Work at office/field العمل من المكتب/الميدان	No لا	No لا	Medical/Surgical face mask القناع الطبي/الجراحي	Sometimes أحيانا	No لا	Yes نعم	No لا		No لا	No لا	No لا	No لا	No لا	Yes نعم	No لا	Yes نعم	24 hours ل24 ساعة	Yes نعم	No لا	Yes نعم	Yes نعم	Yes نعم	Yes	No لا	No لا
2020-10-09 22:39:05	Agree موافق	45 - 50	Male ذكر	With family مع عائلة	College/University جامعي أو أعلى	Working يعمل	More than 8000 أكثر من	Work at office/field العمل من المكتب/الميدان	No لا	No لا	N 95 mask قناع N 95 الطبي	Yes نعم	Yes نعم	Yes نعم	No لا	If exposed to a crowded area اذا تعرضت لزحام	No لا	No لا	No لا	No لا	No لا	Yes نعم	Yes نعم	Yes نعم	24 hours ل24 ساعة	Yes نعم	No لا	Yes نعم	Yes نعم	Yes نعم	Yes	Yes نعم	No لا
2020-10-09 22:39:27	Agree موافق	36 - 45	Male ذكر	With family مع عائلة	College/University جامعي أو أعلى	Working يعمل	More than 8000 أكثر من	Work from home العمل من المنزل	No لا	No لا	N 95 mask قناع N 95 الطبي	Yes نعم	Yes نعم	No لا				No لا	No لا	No لا	No لا	No لا		Yes نعم		Yes نعم	No لا	Yes نعم	Yes نعم	Yes نعم	Yes	Yes نعم	Yes نعم
2020-10-09 22:40:25	Agree موافق	45 - 50	Male ذكر	With family مع عائلة	College/University جامعي أو أعلى	Working يعمل	More than 8000 أكثر من	Work from home العمل من المنزل	Yes نعم	No لا	Cloth or Fabric mask القناع القماشي	No لا	Yes نعم	No لا	No لا		No لا	No لا	No لا	No لا	No لا	No لا	No لا	Yes نعم	Less than 6 hours أقل من 6 ساعات	No لا	No لا	Yes نعم	Yes نعم	Yes نعم	No لا	Yes نعم	No لا
2020-10-09 22:40:39	Agree موافق	26 - 35	Male ذكر	With family مع عائلة	College/University جامعي أو أعلى	Working يعمل	More than 8000 أكثر من	Work from home العمل من المنزل	No لا	No لا	Medical/Surgical face mask القناع الطبي/الجراحي	Yes نعم	Yes نعم	No لا	No لا			No لا	No لا	No لا	No لا	No لا	No لا	Yes نعم	6 - 8 hours من 6 الى 8 ساعات	No لا	No لا	Yes نعم	Yes نعم	Yes نعم	Yes	No لا	No لا
2020-10-09 22:42:20	Agree موافق	More than 50 أكثر من 50 سنة	Male ذكر	With family مع عائلة	College/University جامعي أو أعلى	Not working لا يعمل	More than 8000 أكثر من	Work from home العمل من المنزل	No لا	No لا	Medical/Surgical face mask القناع الطبي/الجراحي	Yes نعم	No لا	Yes نعم	Yes نعم	Everyday كل يوم	Yes نعم	No لا	No لا	No لا	No لا	No لا	Yes نعم	Yes نعم	6 - 8 hours من 6 الى 8 ساعات	No لا	No لا	No لا		Yes نعم	Yes	No لا	No لا
2020-10-09 22:44:34	Agree موافق	36 - 45	Male ذكر	With family مع عائلة	College/University جامعي أو أعلى	Working يعمل	More than 8000 أكثر من	Work at office/field العمل من المكتب/الميدان	No لا	No لا	Medical/Surgical face mask القناع الطبي/الجراحي	No لا	No لا	Yes نعم	No لا	If exposed to a crowded area اذا تعرضت لزحام	No لا	No لا	No لا	No لا	Yes نعم	Yes نعم	Yes نعم	Yes نعم	Less than 6 hours أقل من 6 ساعات	No لا	No لا	Yes نعم	Yes نعم	Yes نعم	Yes	No لا	No لا
2020-10-09 22:45:02	Agree موافق	45 - 50	Male ذكر	With family مع عائلة	College/University جامعي أو أعلى	Working يعمل	More than 8000 أكثر من	Work at office/field العمل من المكتب/الميدان	Yes نعم	No لا	Medical/Surgical face mask القناع الطبي/الجراحي	No لا	No لا	Yes نعم				Yes نعم	No لا	No لا	No لا	No لا	Yes نعم	Yes نعم	24 hours ل24 ساعة	No لا	No لا	Yes نعم	Yes نعم	Yes نعم	Yes	No لا	Yes نعم
2020-10-09 22:45:22	Agree موافق	More than 50 أكثر من 50 سنة	Male ذكر	With family مع عائلة	College/University جامعي أو أعلى	Not working لا يعمل	More than 8000 أكثر من	Work from home العمل من المنزل	No لا	No لا	N 95 mask قناع N 95 الطبي	Yes نعم	No لا	No لا	No لا	If exposed to a crowded area اذا تعرضت لزحام	No لا	No لا	No لا	No لا	No لا	Yes نعم	Yes نعم	Yes نعم	Less than 6 hours أقل من 6 ساعات	Yes نعم	No لا	Yes نعم	Yes نعم	Yes نعم	Yes	Yes نعم	No لا
2020-10-09 22:45:29	Agree موافق	36 - 45	Male ذكر	With family مع عائلة	College/University جامعي أو أعلى	Working يعمل	More than 8000 أكثر من	Work from home العمل من المنزل	Yes نعم	No لا	Cloth or Fabric mask القناع القماشي	Sometimes أحيانا	No لا	No لا	Yes نعم	Weekly once مرة في الاسبوع	No لا	No لا	No لا	No لا	No لا	No لا	Yes نعم	Yes نعم	Less than 6 hours أقل من 6 ساعات	Yes نعم	No لا	No لا	Yes نعم	Yes نعم	Yes	Yes نعم	Yes نعم
2020-10-09 22:47:51	Agree موافق	45 - 50	Male ذكر	With family مع عائلة	College/University جامعي أو أعلى	Working يعمل	More than 8000 أكثر من	Work at office/field العمل من المكتب/الميدان	Yes نعم	No لا	Medical/Surgical face mask القناع الطبي/الجراحي	No لا	No لا	Yes نعم				Yes نعم	No لا	No لا	No لا	No لا	Yes نعم	Yes نعم	24 hours ل24 ساعة	No لا	No لا	Yes نعم	Yes نعم	Yes نعم	Yes	No لا	Yes نعم
2020-10-09 22:48:20	Agree موافق	36 - 45	Male ذكر	With family مع عائلة	College/University جامعي أو أعلى	Working يعمل	More than 8000 أكثر من	Work at office/field العمل من المكتب/الميدان	Yes نعم	No لا	Medical/Surgical face mask القناع الطبي/الجراحي	Sometimes أحيانا	No لا	Yes نعم				No لا	No لا	Yes نعم	No لا	Yes نعم	Yes نعم	Yes نعم	6 - 8 hours من 6 الى 8 ساعات	No لا	No لا	Yes نعم	Yes نعم	Yes نعم	Yes	Yes نعم	Yes نعم
2020-10-09 22:49:59	Agree موافق	26 - 35	Male ذكر	With family مع عائلة	College/University جامعي أو أعلى	Working يعمل	More than 8000 أكثر من	Work from home العمل من المنزل	No لا	No لا	Medical/Surgical face mask القناع الطبي/الجراحي	No لا	No لا	Yes نعم	Yes نعم	Everyday كل يوم	No لا	No لا	No لا	No لا	No لا	No لا	Yes نعم	Yes نعم	6 - 8 hours من 6 الى 8 ساعات	No لا	No لا	No لا	Yes نعم	Yes نعم	Yes	Yes نعم	Yes نعم
2020-10-09 22:53:17	Agree موافق	More than 50 أكثر من 50 سنة	Male ذكر	With family مع عائلة	College/University جامعي أو أعلى	Working يعمل	More than 8000 أكثر من	Work at office/field العمل من المكتب/الميدان	No لا	No لا	Medical/Surgical face mask القناع الطبي/الجراحي	Yes نعم	Yes نعم	Yes نعم				No لا	No لا	No لا	No لا	No لا	No لا	Yes نعم	Less than 6 hours أقل من 6 ساعات	Yes نعم	No لا	No لا	Yes نعم	Yes نعم	Yes	No لا	Yes نعم
2020-10-09 22:55:04	Agree موافق	45 - 50	Female انثى	With family مع عائلة	Secondary school ثانوي	Working يعمل	More than 8000 أكثر من	Work from home العمل من المنزل	Yes نعم	No لا	Medical/Surgical face mask القناع الطبي/الجراحي	Sometimes أحيانا	No لا	Yes نعم	No لا		No لا	No لا	No لا	No لا		Yes نعم	Yes نعم	No لا	Less than 6 hours أقل من 6 ساعات	Yes نعم	No لا	No لا	Yes نعم	Yes نعم	Yes	Yes نعم	No لا
2020-10-09 22:56:42	Agree موافق	45 - 50	Male ذكر	With family مع عائلة	College/University جامعي أو أعلى	Working يعمل	More than 8000 أكثر من	Work at office/field العمل من المكتب/الميدان	No لا	No لا	Medical/Surgical face mask القناع الطبي/الجراحي	Sometimes أحيانا	No لا	Yes نعم				No لا	No لا	No لا	No لا	No لا	No لا	Yes نعم	24 hours ل24 ساعة	No لا	No لا	No لا	Yes نعم	Yes نعم	Yes	Yes نعم	Yes نعم
2020-10-09 22:59:55	Agree موافق	18 - 25	Male ذكر	With family مع عائلة	College/University جامعي أو أعلى	Student طالب	Less than 3000 أقل من 3000 ريال	Work from home العمل من المنزل	No لا	Yes نعم	N 95 mask قناع N 95 الطبي	Yes نعم	No لا	No لا	No لا	Everyday كل يوم	Yes نعم	No لا	No لا	No لا	No لا	No لا	No لا	Yes نعم	Less than 6 hours أقل من 6 ساعات	No لا	No لا	No لا	Yes نعم	Yes نعم	Yes	Yes نعم	Yes نعم
2020-10-09 23:00:05	Agree موافق	More than 50 أكثر من 50 سنة	Male ذكر	With family مع عائلة	College/University جامعي أو أعلى	Working يعمل	More than 8000 أكثر من	Work at office/field العمل من المكتب/الميدان	No لا	No لا	N 95 mask قناع N 95 الطبي	No لا	No لا	Yes نعم	Yes نعم		No لا		No لا	No لا	No لا	Yes نعم	Yes نعم	Yes نعم	Less than 6 hours أقل من 6 ساعات	Yes نعم	No لا	Yes نعم	Yes نعم	Yes نعم	Yes	No لا	Yes نعم
2020-10-09 23:00:32	Agree موافق	45 - 50	Male ذكر	With family مع عائلة	College/University جامعي أو أعلى	Working يعمل	More than 8000 أكثر من	Work at office/field العمل من المكتب/الميدان	No لا	No لا	N 95 mask قناع N 95 الطبي	Sometimes أحيانا	No لا	No لا	No لا		No لا	No لا	No لا	No لا	No لا	Yes نعم	Yes نعم	No لا	Less than 6 hours أقل من 6 ساعات	Yes نعم	No لا	No لا	Yes نعم	Yes نعم	Yes	Yes نعم	No لا
2020-10-09 23:02:00	Agree موافق	More than 50 أكثر من 50 سنة	Male ذكر	With family مع عائلة	College/University جامعي أو أعلى	Working يعمل	More than 8000 أكثر من	Work at office/field العمل من المكتب/الميدان		No لا	N 95 mask قناع N 95 الطبي	No لا	No لا	Yes نعم	No لا		No لا	No لا	No لا	No لا	No لا	No لا	No لا	Yes نعم	6 - 8 hours من 6 الى 8 ساعات	No لا	No لا	No لا	Yes نعم	Yes نعم	Yes	No لا	Yes نعم
2020-10-09 23:03:20	Agree موافق	More than 50 أكثر من 50 سنة	Male ذكر	With family مع عائلة	College/University جامعي أو أعلى	Working يعمل	More than 8000 أكثر من	Work from home العمل من المنزل	No لا	No لا	Medical/Surgical face mask القناع الطبي/الجراحي	Sometimes أحيانا	No لا	No لا			No لا	No لا	No لا	No لا	No لا	Yes نعم	Yes نعم	Yes نعم	Less than 6 hours أقل من 6 ساعات		No لا	Yes نعم	Yes نعم	Yes نعم	Yes	Yes نعم	Yes نعم
2020-10-09 23:05:32	Agree موافق	26 - 35	Female انثى	With family مع عائلة	College/University جامعي أو أعلى	Home maker ربة منزل			Yes نعم	No لا	Cloth or Fabric mask القناع القماشي	Sometimes أحيانا	No لا	Yes نعم	Yes نعم	If exposed to a crowded area اذا تعرضت لزحام	Yes نعم	Yes نعم	No لا	No لا	No لا	Yes نعم	Yes نعم	No لا	Less than 6 hours أقل من 6 ساعات	Yes نعم	No لا	No لا	Yes نعم	Yes نعم	Yes	Yes نعم	No لا
2020-10-09 23:06:09	Agree موافق	More than 50 أكثر من 50 سنة	Male ذكر	With family مع عائلة	College/University جامعي أو أعلى	Working يعمل	More than 8000 أكثر من	Work at office/field العمل من المكتب/الميدان	No لا	No لا	Medical/Surgical face mask القناع الطبي/الجراحي	No لا	No لا	No لا	No لا		No لا	No لا	No لا	No لا	No لا	Yes نعم	No لا	Yes نعم	Less than 6 hours أقل من 6 ساعات	No لا	No لا	No لا	Yes نعم	Yes نعم	Yes	No لا	Yes نعم
2020-10-09 23:20:36	Agree موافق	45 - 50	Male ذكر	With family مع عائلة	College/University جامعي أو أعلى	Working يعمل	More than 8000 أكثر من	Work at office/field العمل من المكتب/الميدان	No لا	No لا	N 95 mask قناع N 95 الطبي	Sometimes أحيانا	No لا	No لا	Yes نعم	Weekly once مرة في الاسبوع	No لا	No لا	No لا	No لا	No لا	No لا	No لا	No لا	6 - 8 hours من 6 الى 8 ساعات	No لا	No لا	Yes نعم	Yes نعم	Yes نعم	Yes	Yes نعم	No لا
2020-10-09 23:30:32	Agree موافق	18 - 25	Male ذكر	Alone وحيدا	Secondary school ثانوي	Working يعمل	3000-6000	Work at office/field العمل من المكتب/الميدان	Yes نعم	No لا	Medical/Surgical face mask القناع الطبي/الجراحي	Sometimes أحيانا	No لا	No لا	No لا		No لا	No لا	No لا	Yes نعم	No لا	Yes نعم	No لا	Yes نعم	8 - 12 hours من 8 الى 12 ساعة	Yes نعم	No لا	Yes نعم	Yes نعم	Yes نعم	Yes	No لا	Yes نعم
2020-10-09 23:32:41	Agree موافق	26 - 35	Female انثى	With family مع عائلة	College/University جامعي أو أعلى	Not working لا يعمل			Yes نعم	No لا	N 95 mask قناع N 95 الطبي	Sometimes أحيانا	Yes نعم	No لا			No لا	Yes نعم	No لا	Yes نعم	No لا	Yes نعم	No لا	Yes نعم	Less than 6 hours أقل من 6 ساعات	No لا	No لا	Yes نعم	Yes نعم		Yes	Yes نعم	No لا
2020-10-09 23:46:02	Agree موافق	18 - 25	Male ذكر	With family مع عائلة	College/University جامعي أو أعلى	Student طالب	Less than 3000 أقل من 3000 ريال	Work from home العمل من المنزل	Yes نعم	No لا	Cloth or Fabric mask القناع القماشي	Yes نعم	No لا	Yes نعم	Yes نعم	Everyday كل يوم	Yes نعم	Yes نعم	Yes نعم	Yes نعم	Yes نعم	No لا	Yes نعم	Yes نعم	Less than 6 hours أقل من 6 ساعات	Yes نعم	Yes نعم	Yes نعم	No لا	Yes نعم	No لا	No لا	No لا
2020-10-09 23:53:17	Agree موافق	More than 50 أكثر من 50 سنة	Male ذكر	With family مع عائلة	College/University جامعي أو أعلى	Working يعمل	More than 8000 أكثر من	Work at office/field العمل من المكتب/الميدان	No لا	No لا	Medical/Surgical face mask القناع الطبي/الجراحي	No لا	No لا	No لا	No لا		No لا	No لا	No لا	No لا	No لا	Yes نعم	No لا	Yes نعم	Less than 6 hours أقل من 6 ساعات	No لا	No لا	No لا	Yes نعم	Yes نعم	Yes	No لا	Yes نعم
2020-10-09 23:54:29	Agree موافق		Male ذكر	Alone وحيدا	College/University جامعي أو أعلى	Student طالب	Less than 3000 أقل من 3000 ريال	Work at office/field العمل من المكتب/الميدان	Yes نعم	No لا	Cloth or Fabric mask القناع القماشي	Yes نعم	Yes نعم	Yes نعم	Yes نعم	Every alternative day يوم بعد يوم	Yes نعم	Yes نعم	Yes نعم	Yes نعم	Yes نعم	Yes نعم	Yes نعم	Yes نعم	Less than 6 hours أقل من 6 ساعات	Yes نعم	Yes نعم	Yes نعم	Yes نعم	Yes نعم	Yes	Yes نعم	Yes نعم
2020-10-09 23:57:54	Agree موافق	26 - 35	Female انثى	With family مع عائلة	Secondary school ثانوي	Home maker ربة منزل	3000-6000	Work from home العمل من المنزل	Yes نعم	No لا	Medical/Surgical face mask القناع الطبي/الجراحي	Yes نعم	No لا	Yes نعم	Yes نعم	Everyday كل يوم	No لا	Yes نعم	No لا	No لا	No لا	No لا	No لا	Yes نعم	Less than 6 hours أقل من 6 ساعات	Yes نعم	No لا	Yes نعم	Yes نعم	Yes نعم	Yes	No لا	Yes نعم
2020-10-10 00:00:04	Agree موافق	18 - 25	Male ذكر	With family مع عائلة	College/University جامعي أو أعلى	Student طالب	Less than 3000 أقل من 3000 ريال	Work at office/field العمل من المكتب/الميدان	No لا	No لا	Medical/Surgical face mask القناع الطبي/الجراحي	Sometimes أحيانا	No لا	Yes نعم	No لا		No لا	No لا	No لا	Yes نعم	No لا	Yes نعم	Yes نعم	Yes نعم	8 - 12 hours من 8 الى 12 ساعة	Yes نعم	No لا	Yes نعم	Yes نعم	No لا	Yes	No لا	Yes نعم
2020-10-10 00:02:25	Agree موافق	36 - 45	Male ذكر	With family مع عائلة	College/University جامعي أو أعلى	Working يعمل	More than 8000 أكثر من	Work at office/field العمل من المكتب/الميدان	Yes نعم	No لا	Cloth or Fabric mask القناع القماشي	No لا	Yes نعم	Yes نعم	No لا		No لا	Yes نعم	Yes نعم	Yes نعم	Yes نعم	Yes نعم	Yes نعم	No لا	24 hours ل24 ساعة	Yes نعم	No لا	No لا	No لا	No لا	No لا	Yes نعم	No لا
2020-10-10 00:09:10	Agree موافق	18 - 25	Male ذكر	With family مع عائلة	College/University جامعي أو أعلى	Student طالب	Less than 3000 أقل من 3000 ريال	Work from home العمل من المنزل	No لا	Yes نعم	Medical/Surgical face mask القناع الطبي/الجراحي	Sometimes أحيانا	No لا	No لا	No لا		No لا	No لا	No لا	Yes نعم	No لا	No لا	Yes نعم	Yes نعم	6 - 8 hours من 6 الى 8 ساعات	Yes نعم	No لا	Yes نعم	Yes نعم	Yes نعم	Yes	Yes نعم	No لا
2020-10-10 00:13:58	Agree موافق	45 - 50	Male ذكر	With family مع عائلة	College/University جامعي أو أعلى	Working يعمل	More than 8000 أكثر من	Work at office/field العمل من المكتب/الميدان	Yes نعم	No لا	N 95 mask قناع N 95 الطبي	Sometimes أحيانا	No لا	Yes نعم	Yes نعم	Everyday كل يوم	No لا	No لا	No لا	Yes نعم	No لا	Yes نعم	Yes نعم	Yes نعم	Less than 6 hours أقل من 6 ساعات	No لا	No لا	Yes نعم	Yes نعم	Yes نعم	Yes	Yes نعم	Yes نعم
2020-10-10 00:14:51	Agree موافق	18 - 25	Male ذكر	Alone وحيدا	College/University جامعي أو أعلى	Student طالب	Less than 3000 أقل من 3000 ريال	Work from home العمل من المنزل	No لا	No لا		Yes نعم	No لا	Yes نعم			Yes نعم	No لا	No لا	No لا	No لا	Yes نعم	Yes نعم	Yes نعم	Less than 6 hours أقل من 6 ساعات	Yes نعم	Yes نعم	No لا	Yes نعم	No لا	Yes	Yes نعم	Yes نعم
2020-10-10 00:17:35	Agree موافق	18 - 25	Male ذكر	Alone وحيدا	College/University جامعي أو أعلى	Student طالب	Less than 3000 أقل من 3000 ريال	Work from home العمل من المنزل	No لا	Yes نعم	Medical/Surgical face mask القناع الطبي/الجراحي	Sometimes أحيانا	Yes نعم	No لا	No لا	Weekly once مرة في الاسبوع	No لا	No لا	No لا	Yes نعم	No لا	Yes نعم	Yes نعم	Yes نعم	24 hours ل24 ساعة	Yes نعم	No لا	Yes نعم	Yes نعم	Yes نعم	Yes	No لا	No لا
2020-10-10 00:22:23	Agree موافق	45 - 50	Male ذكر	With family مع عائلة	College/University جامعي أو أعلى	Working يعمل	More than 8000 أكثر من	Work at office/field العمل من المكتب/الميدان	No لا	No لا	Medical/Surgical face mask القناع الطبي/الجراحي	Sometimes أحيانا	Yes نعم	Yes نعم	No لا		No لا	Yes نعم	No لا	Yes نعم	No لا	Yes نعم	Yes نعم	Yes نعم	Less than 6 hours أقل من 6 ساعات	Yes نعم	No لا	Yes نعم	Yes نعم	Yes نعم	Yes	No لا	No لا
2020-10-10 00:25:37	Agree موافق	18 - 25	Male ذكر	With family مع عائلة	College/University جامعي أو أعلى	Student طالب	Less than 3000 أقل من 3000 ريال	Work from home العمل من المنزل	Yes نعم	No لا	Medical/Surgical face mask القناع الطبي/الجراحي	Sometimes أحيانا	No لا	No لا	Yes نعم	Every alternative day يوم بعد يوم	Yes نعم	Yes نعم	Yes نعم	Yes نعم	Yes نعم	Yes نعم	Yes نعم	Yes نعم	24 hours ل24 ساعة	Yes نعم	Yes نعم	Yes نعم	Yes نعم	Yes نعم	No لا	Yes نعم	Yes نعم
2020-10-10 00:31:54	Agree موافق	18 - 25	Female انثى	Alone وحيدا	College/University جامعي أو أعلى	Working يعمل	3000-6000	Work at office/field العمل من المكتب/الميدان	No لا	Yes نعم	Cloth or Fabric mask القناع القماشي	Yes نعم	No لا	No لا	Yes نعم	Every alternative day يوم بعد يوم	Yes نعم	No لا	No لا	No لا	No لا	No لا	No لا	No لا	6 - 8 hours من 6 الى 8 ساعات	No لا	No لا	No لا	Yes نعم	Yes نعم	Yes	No لا	No لا
2020-10-10 00:50:51	Agree موافق	45 - 50	Male ذكر	With family مع عائلة	College/University جامعي أو أعلى	Working يعمل	More than 8000 أكثر من	Work from home العمل من المنزل	No لا	No لا	Cloth or Fabric mask القناع القماشي	No لا	No لا	No لا	No لا		No لا	No لا	No لا	No لا	No لا	Yes نعم	No لا	Yes نعم	Less than 6 hours أقل من 6 ساعات	No لا	No لا	Yes نعم	Yes نعم	Yes نعم	Yes	No لا	Yes نعم
2020-10-10 01:04:31	Agree موافق	More than 50 أكثر من 50 سنة	Male ذكر	With family مع عائلة	Secondary school ثانوي	Not working لا يعمل			Yes نعم	No لا	Medical/Surgical face mask القناع الطبي/الجراحي	Sometimes أحيانا	No لا	No لا	No لا		No لا	No لا	No لا	No لا	No لا	No لا	Yes نعم	Yes نعم	Less than 6 hours أقل من 6 ساعات	Yes نعم	No لا	Yes نعم	Yes نعم	Yes نعم	No لا	Yes نعم	Yes نعم
2020-10-10 01:04:52	Agree موافق	18 - 25	Male ذكر	With family مع عائلة	College/University جامعي أو أعلى	Working يعمل	3000-6000	Work at office/field العمل من المكتب/الميدان	No لا	No لا	Medical/Surgical face mask القناع الطبي/الجراحي	Sometimes أحيانا	No لا	Yes نعم	Yes نعم	Weekly once مرة في الاسبوع	No لا	No لا	No لا	No لا	No لا	Yes نعم	Yes نعم	Yes نعم	24 hours ل24 ساعة	No لا	No لا	Yes نعم	Yes نعم	Yes نعم		Yes نعم	Yes نعم
2020-10-10 01:08:36	Agree موافق	26 - 35	Male ذكر	With family مع عائلة	College/University جامعي أو أعلى	Working يعمل	6000-8000	Work at office/field العمل من المكتب/الميدان	Yes نعم	Yes نعم	N 95 mask قناع N 95 الطبي	Yes نعم	No لا	No لا	No لا		Yes نعم	No لا	No لا	No لا	No لا	No لا	No لا	Yes نعم	Less than 6 hours أقل من 6 ساعات	No لا	No لا	No لا	Yes نعم	Yes نعم	Yes	No لا	Yes نعم
2020-10-10 01:11:05	Agree موافق	18 - 25	Male ذكر	Alone وحيدا	College/University جامعي أو أعلى	Student طالب	Less than 3000 أقل من 3000 ريال	Work at office/field العمل من المكتب/الميدان	No لا	Yes نعم	Medical/Surgical face mask القناع الطبي/الجراحي	No لا	No لا	Yes نعم	No لا		No لا	Yes نعم	No لا	Yes نعم	Yes نعم	Yes نعم	Yes نعم	No لا	Less than 6 hours أقل من 6 ساعات	Yes نعم	No لا	Yes نعم	Yes نعم	No لا	No لا	Yes نعم	No لا
2020-10-10 01:14:00	Agree موافق	More than 50 أكثر من 50 سنة	Male ذكر	With family مع عائلة	College/University جامعي أو أعلى	Not working لا يعمل	More than 8000 أكثر من		No لا	No لا	Cloth or Fabric mask القناع القماشي	No لا	No لا	No لا	Yes نعم	Every alternative day يوم بعد يوم	No لا	No لا	No لا	No لا	No لا	Yes نعم	Yes نعم	Yes نعم	Less than 6 hours أقل من 6 ساعات	No لا	No لا	Yes نعم	Yes نعم	Yes نعم	Yes	Yes نعم	No لا
2020-10-10 01:47:05	Agree موافق	26 - 35	Female انثى	With family مع عائلة	College/University جامعي أو أعلى	Home maker ربة منزل	Less than 3000 أقل من 3000 ريال	Work from home العمل من المنزل	Yes نعم	No لا	Cloth or Fabric mask القناع القماشي	Sometimes أحيانا	No لا	No لا	No لا	If exposed to a crowded area اذا تعرضت لزحام	Yes نعم	No لا	No لا	No لا	No لا	No لا	No لا	Yes نعم	Less than 6 hours أقل من 6 ساعات	Yes نعم	No لا	Yes نعم	Yes نعم	Yes نعم	Yes	No لا	No لا
2020-10-10 01:47:14	Agree موافق	18 - 25		With family مع عائلة	College/University جامعي أو أعلى		More than 8000 أكثر من	Work from home العمل من المنزل	No لا	No لا	Medical/Surgical face mask القناع الطبي/الجراحي	No لا	No لا	Yes نعم	No لا		No لا	Yes نعم	No لا	No لا	No لا	Yes نعم		Yes نعم	24 hours ل24 ساعة	Yes نعم	Yes نعم	Yes نعم	Yes نعم	Yes نعم	Yes	Yes نعم	Yes نعم
2020-10-10 01:57:29	Agree موافق	45 - 50	Male ذكر	With family مع عائلة	Secondary school ثانوي	Working يعمل	More than 8000 أكثر من	Work at office/field العمل من المكتب/الميدان	No لا	No لا	Cloth or Fabric mask القناع القماشي	No لا	Yes نعم	Yes نعم	No لا	Weekly once مرة في الاسبوع	No لا	Yes نعم	No لا	Yes نعم	Yes نعم	Yes نعم	Yes نعم	No لا	24 hours ل24 ساعة	No لا	No لا	Yes نعم	Yes نعم	Yes نعم	Yes	Yes نعم	No لا
2020-10-10 01:59:05	Agree موافق	18 - 25	Male ذكر	Alone وحيدا	College/University جامعي أو أعلى	Student طالب	Less than 3000 أقل من 3000 ريال	Work from home العمل من المنزل	No لا	No لا	Cloth or Fabric mask القناع القماشي	No لا	Yes نعم	Yes نعم	Yes نعم	Every alternative day يوم بعد يوم	Yes نعم	Yes نعم	Yes نعم	Yes نعم	Yes نعم	Yes نعم	Yes نعم	Yes نعم	Less than 6 hours أقل من 6 ساعات	Yes نعم	Yes نعم	Yes نعم	Yes نعم	Yes نعم	Yes	Yes نعم	Yes نعم
2020-10-10 02:08:25	Agree موافق	18 - 25	Male ذكر	With family مع عائلة	College/University جامعي أو أعلى	Student طالب	More than 8000 أكثر من	Work from home العمل من المنزل	No لا	Yes نعم	Medical/Surgical face mask القناع الطبي/الجراحي	Sometimes أحيانا	No لا	No لا				No لا		No لا	No لا	No لا	Yes نعم	Yes نعم	6 - 8 hours من 6 الى 8 ساعات	No لا	No لا	Yes نعم	Yes نعم	Yes نعم	Yes		Yes نعم
2020-10-10 02:14:32	Agree موافق	More than 50 أكثر من 50 سنة	Male ذكر	With family مع عائلة	College/University جامعي أو أعلى	Working يعمل	Less than 3000 أقل من 3000 ريال	Work from home العمل من المنزل	Yes نعم	No لا	Medical/Surgical face mask القناع الطبي/الجراحي	No لا	No لا	No لا	No لا		No لا	No لا	No لا	Yes نعم	No لا	Yes نعم	Yes نعم	No لا	Less than 6 hours أقل من 6 ساعات	No لا	No لا	Yes نعم		Yes نعم	Yes	Yes نعم	Yes نعم
2020-10-10 02:17:34	Agree موافق	26 - 35	Female انثى	With family مع عائلة	College/University جامعي أو أعلى	Not working لا يعمل	3000-6000	Work from home العمل من المنزل	Yes نعم	No لا	Medical/Surgical face mask القناع الطبي/الجراحي	No لا	No لا	No لا	No لا		No لا	Yes نعم	No لا	No لا	No لا	Yes نعم	No لا	Yes نعم	Less than 6 hours أقل من 6 ساعات	No لا	No لا	Yes نعم	Yes نعم	Yes نعم	Yes	No لا	No لا
2020-10-10 03:40:58	Agree موافق	26 - 35	Male ذكر	With family مع عائلة	College/University جامعي أو أعلى	Working يعمل	6000-8000	Work at office/field العمل من المكتب/الميدان	Yes نعم	Yes نعم	N 95 mask قناع N 95 الطبي	Yes نعم	No لا	No لا	No لا		Yes نعم	No لا	No لا	No لا	No لا	No لا	No لا	Yes نعم	Less than 6 hours أقل من 6 ساعات	No لا	No لا	No لا	Yes نعم	Yes نعم	Yes	No لا	Yes نعم
2020-10-10 05:38:38	Agree موافق	18 - 25	Male ذكر	Alone وحيدا	College/University جامعي أو أعلى	Student طالب	Less than 3000 أقل من 3000 ريال	Work from home العمل من المنزل	No لا	Yes نعم	Medical/Surgical face mask القناع الطبي/الجراحي	No لا	No لا	No لا	No لا	If exposed to a crowded area اذا تعرضت لزحام	No لا	No لا	No لا	No لا	No لا	Yes نعم	Yes نعم	Yes نعم	24 hours ل24 ساعة	Yes نعم	No لا	No لا	Yes نعم	Yes نعم	Yes	No لا	No لا
2020-10-10 06:13:50	Agree موافق	18 - 25	Male ذكر	With family مع عائلة	College/University جامعي أو أعلى	Student طالب	More than 8000 أكثر من	Work from home العمل من المنزل	No لا	Yes نعم	Medical/Surgical face mask القناع الطبي/الجراحي	No لا	No لا	No لا			Yes نعم	No لا	No لا	No لا	No لا	Yes نعم	Yes نعم	Yes نعم	Less than 6 hours أقل من 6 ساعات	No لا	No لا	Yes نعم	Yes نعم	Yes نعم	Yes	No لا	No لا
2020-10-10 06:29:09	Agree موافق	26 - 35	Male ذكر	With family مع عائلة	College/University جامعي أو أعلى	Working يعمل	More than 8000 أكثر من	Work from home العمل من المنزل	No لا	No لا	Medical/Surgical face mask القناع الطبي/الجراحي	Sometimes أحيانا	No لا	Yes نعم	Yes نعم	Every alternative day يوم بعد يوم	Yes نعم	No لا	No لا	No لا	No لا	No لا	Yes نعم	Yes نعم	24 hours ل24 ساعة	No لا	No لا	No لا	Yes نعم	Yes نعم	Yes	No لا	Yes نعم
2020-10-10 06:29:18	Agree موافق	26 - 35	Male ذكر	With family مع عائلة	College/University جامعي أو أعلى	Working يعمل	More than 8000 أكثر من	Work from home العمل من المنزل	No لا	No لا	Medical/Surgical face mask القناع الطبي/الجراحي	Sometimes أحيانا	No لا	Yes نعم	Yes نعم	Every alternative day يوم بعد يوم	Yes نعم	No لا	No لا	No لا	No لا	No لا	Yes نعم	Yes نعم	24 hours ل24 ساعة	No لا	No لا	No لا	Yes نعم	Yes نعم	Yes	No لا	Yes نعم
2020-10-10 08:11:52	Agree موافق	18 - 25	Female انثى	With family مع عائلة	College/University جامعي أو أعلى	Working يعمل	Less than 3000 أقل من 3000 ريال	Work at office/field العمل من المكتب/الميدان	No لا	Yes نعم	Medical/Surgical face mask القناع الطبي/الجراحي	Sometimes أحيانا	No لا	Yes نعم	No لا		No لا	No لا	No لا	No لا	No لا	No لا	No لا	No لا	Less than 6 hours أقل من 6 ساعات	No لا	No لا	No لا	Yes نعم	Yes نعم	Yes	No لا	Yes نعم
2020-10-10 09:52:42	Agree موافق	18 - 25	Male ذكر	With family مع عائلة	College/University جامعي أو أعلى	Student طالب	More than 8000 أكثر من	Work from home العمل من المنزل	No لا	Yes نعم	Medical/Surgical face mask القناع الطبي/الجراحي	No لا	No لا	No لا			Yes نعم	No لا	No لا	No لا	No لا	Yes نعم	Yes نعم	Yes نعم	Less than 6 hours أقل من 6 ساعات	No لا	No لا	Yes نعم	Yes نعم	Yes نعم	Yes	No لا	No لا
2020-10-10 10:05:00	Agree موافق	26 - 35	Male ذكر	With family مع عائلة	College/University جامعي أو أعلى	Working يعمل	6000-8000	Work at office/field العمل من المكتب/الميدان	No لا	No لا	Medical/Surgical face mask القناع الطبي/الجراحي	No لا	Yes نعم	Yes نعم	No لا		No لا	Yes نعم	No لا	Yes نعم	No لا	Yes نعم	Yes نعم	Yes نعم	24 hours ل24 ساعة	Yes نعم	No لا	Yes نعم	Yes نعم	No لا	No لا	No لا	No لا
2020-10-10 11:03:40	Agree موافق	More than 50 أكثر من 50 سنة	Male ذكر	With family مع عائلة	Secondary school ثانوي	Not working لا يعمل	More than 8000 أكثر من	Work from home العمل من المنزل	No لا	No لا	Medical/Surgical face mask القناع الطبي/الجراحي	No لا	Yes نعم	Yes نعم	Yes نعم	Weekly once مرة في الاسبوع	No لا	Yes نعم	No لا	No لا	No لا	Yes نعم	Yes نعم	Yes نعم	Less than 6 hours أقل من 6 ساعات	No لا	No لا	Yes نعم	Yes نعم	Yes نعم	Yes	No لا	No لا
2020-10-10 11:15:38	Agree موافق	36 - 45	Male ذكر	With family مع عائلة	College/University جامعي أو أعلى	Working يعمل	More than 8000 أكثر من	Work from home العمل من المنزل	No لا	No لا	Medical/Surgical face mask القناع الطبي/الجراحي	Sometimes أحيانا	Yes نعم	Yes نعم	No لا		No لا	No لا	No لا	No لا	No لا	No لا	Yes نعم	Yes نعم	24 hours ل24 ساعة	Yes نعم	No لا	Yes نعم	Yes نعم	Yes نعم	No لا	Yes نعم	Yes نعم
2020-10-10 11:31:57	Agree موافق	18 - 25	Female انثى	With family مع عائلة	College/University جامعي أو أعلى	Student طالب	Less than 3000 أقل من 3000 ريال	Work at office/field العمل من المكتب/الميدان	No لا	Yes نعم	Medical/Surgical face mask القناع الطبي/الجراحي	Yes نعم	Yes نعم	No لا			No لا	No لا	No لا	No لا	No لا	No لا	No لا	Yes نعم	8 - 12 hours من 8 الى 12 ساعة	No لا	No لا	No لا	Yes نعم	Yes نعم	Yes	No لا	Yes نعم
2020-10-10 13:18:12	Agree موافق	26 - 35	Male ذكر	With family مع عائلة	Secondary school ثانوي	Not working لا يعمل			Yes نعم	Yes نعم	Medical/Surgical face mask القناع الطبي/الجراحي	Sometimes أحيانا	No لا	No لا	Yes نعم	If exposed to a crowded area اذا تعرضت لزحام	No لا	No لا	No لا	No لا	No لا	Yes نعم	No لا	Yes نعم	24 hours ل24 ساعة	Yes نعم	No لا	Yes نعم	Yes نعم	Yes نعم	Yes	No لا	Yes نعم
2020-10-10 13:21:48	Agree موافق	26 - 35	Male ذكر	With family مع عائلة	College/University جامعي أو أعلى	Working يعمل	6000-8000	Work at office/field العمل من المكتب/الميدان	No لا	No لا	Medical/Surgical face mask القناع الطبي/الجراحي	Sometimes أحيانا	No لا	Yes نعم			Yes نعم	No لا	No لا	No لا	No لا	Yes نعم	Yes نعم	Yes نعم	Less than 6 hours أقل من 6 ساعات	No لا	No لا	No لا	Yes نعم	Yes نعم	Yes	No لا	No لا
2020-10-10 14:12:44	Agree موافق	18 - 25		With family مع عائلة	College/University جامعي أو أعلى		More than 8000 أكثر من	Work from home العمل من المنزل	No لا	No لا	Medical/Surgical face mask القناع الطبي/الجراحي	No لا	No لا	Yes نعم	No لا		No لا	Yes نعم	No لا	No لا	No لا	Yes نعم		Yes نعم	24 hours ل24 ساعة	Yes نعم	Yes نعم	Yes نعم	Yes نعم	Yes نعم	Yes	Yes نعم	Yes نعم
2020-10-10 14:48:19	Agree موافق	45 - 50	Male ذكر	With family مع عائلة	College/University جامعي أو أعلى	Working يعمل	More than 8000 أكثر من	Work from home العمل من المنزل	No لا	No لا	Cloth or Fabric mask القناع القماشي	No لا	No لا	No لا	No لا		No لا	No لا	No لا	No لا	No لا	Yes نعم	No لا	Yes نعم	Less than 6 hours أقل من 6 ساعات	No لا	No لا	Yes نعم	Yes نعم	Yes نعم	Yes	No لا	Yes نعم
2020-10-10 16:19:42	Agree موافق	36 - 45	Male ذكر	With family مع عائلة	College/University جامعي أو أعلى	Working يعمل	More than 8000 أكثر من	Work from home العمل من المنزل	Yes نعم	No لا	Cloth or Fabric mask القناع القماشي	Sometimes أحيانا	No لا	No لا	Yes نعم	Weekly once مرة في الاسبوع	No لا	No لا	No لا	No لا	No لا	No لا	Yes نعم	Yes نعم	Less than 6 hours أقل من 6 ساعات	Yes نعم	No لا	No لا	Yes نعم	Yes نعم	Yes	Yes نعم	Yes نعم
2020-10-10 16:22:34	Agree موافق	36 - 45	Male ذكر	With family مع عائلة	Secondary school ثانوي	Working يعمل	More than 8000 أكثر من	Work at office/field العمل من المكتب/الميدان	No لا	No لا	Medical/Surgical face mask القناع الطبي/الجراحي	Sometimes أحيانا	No لا	No لا	Yes نعم	Weekly once مرة في الاسبوع	Yes نعم	No لا	No لا	No لا	No لا	No لا	Yes نعم	Yes نعم	24 hours ل24 ساعة	No لا	No لا	No لا	Yes نعم	Yes نعم	Yes	No لا	Yes نعم
2020-10-10 16:44:11	Agree موافق	18 - 25	Male ذكر	With family مع عائلة	College/University جامعي أو أعلى	Not working لا يعمل			No لا	No لا	N 95 mask قناع N 95 الطبي	No لا	No لا	No لا	No لا	Everyday كل يوم	Yes نعم	No لا	No لا	No لا	No لا	Yes نعم	No لا	No لا	6 - 8 hours من 6 الى 8 ساعات	No لا	No لا	Yes نعم	No لا	Yes نعم	No لا	Yes نعم	Yes نعم
2020-10-10 17:10:28	Agree موافق	18 - 25	Male ذكر	With family مع عائلة	College/University جامعي أو أعلى	Student طالب	Less than 3000 أقل من 3000 ريال	Work from home العمل من المنزل	No لا	No لا	Medical/Surgical face mask القناع الطبي/الجراحي	No لا	Yes نعم	Yes نعم	No لا	Weekly once مرة في الاسبوع	Yes نعم	No لا	No لا	No لا	No لا	Yes نعم	No لا	Yes نعم	Less than 6 hours أقل من 6 ساعات	Yes نعم	No لا	Yes نعم	Yes نعم	Yes نعم	Yes	No لا	Yes نعم
2020-10-10 18:49:49	Agree موافق	36 - 45	Male ذكر	With family مع عائلة	College/University جامعي أو أعلى	Not working لا يعمل	Less than 3000 أقل من 3000 ريال		Yes نعم	No لا	Medical/Surgical face mask القناع الطبي/الجراحي	No لا	Yes نعم	No لا	No لا		No لا	No لا	No لا	No لا	No لا	Yes نعم	Yes نعم	Yes نعم	Less than 6 hours أقل من 6 ساعات	No لا	No لا	Yes نعم	Yes نعم			Yes نعم	No لا
2020-10-10 19:02:57	Agree موافق	26 - 35	Male ذكر	With family مع عائلة	Secondary school ثانوي	Working يعمل	6000-8000	Work at office/field العمل من المكتب/الميدان	Yes نعم	No لا	Cloth or Fabric mask القناع القماشي	Sometimes أحيانا	No لا	Yes نعم	Yes نعم	Every alternative day يوم بعد يوم	No لا	Yes نعم	No لا	No لا	No لا	Yes نعم	No لا	No لا	6 - 8 hours من 6 الى 8 ساعات	No لا	No لا	No لا	Yes نعم	Yes نعم	Yes	No لا	No لا
2020-10-10 19:17:36	Agree موافق	36 - 45	Male ذكر	With family مع عائلة	College/University جامعي أو أعلى	Working يعمل	More than 8000 أكثر من	Work from home العمل من المنزل	No لا	No لا	Medical/Surgical face mask القناع الطبي/الجراحي	Sometimes أحيانا	Yes نعم	Yes نعم	No لا		No لا	No لا	No لا	No لا	No لا	No لا	Yes نعم	Yes نعم	24 hours ل24 ساعة	Yes نعم	No لا	Yes نعم	Yes نعم	Yes نعم	No لا	Yes نعم	Yes نعم
2020-10-10 19:30:36	Agree موافق	45 - 50	Female انثى	With family مع عائلة	Secondary school ثانوي	Working يعمل	More than 8000 أكثر من	Work from home العمل من المنزل	Yes نعم	No لا	Cloth or Fabric mask القناع القماشي	Yes نعم	Yes نعم	Yes نعم	Yes نعم	If exposed to a crowded area اذا تعرضت لزحام	Yes نعم	No لا	No لا	No لا	No لا	No لا	No لا	Yes نعم	Less than 6 hours أقل من 6 ساعات	No لا	No لا	Yes نعم	Yes نعم	Yes نعم	Yes	No لا	Yes نعم
2020-10-10 21:32:20	Agree موافق	More than 50 أكثر من 50 سنة	Male ذكر	With family مع عائلة	College/University جامعي أو أعلى	Working يعمل	More than 8000 أكثر من	Work at office/field العمل من المكتب/الميدان	No لا	No لا	N 95 mask قناع N 95 الطبي	No لا	No لا	Yes نعم	Yes نعم		No لا		No لا	No لا	No لا	Yes نعم	Yes نعم	Yes نعم	Less than 6 hours أقل من 6 ساعات	Yes نعم	No لا	Yes نعم	Yes نعم	Yes نعم	Yes	No لا	Yes نعم
2020-10-10 23:02:12	Agree موافق	18 - 25	Female انثى	With family مع عائلة	College/University جامعي أو أعلى	Student طالب	Less than 3000 أقل من 3000 ريال	Work from home العمل من المنزل	Yes نعم	No لا	Medical/Surgical face mask القناع الطبي/الجراحي	Yes نعم	Yes نعم	No لا				Yes نعم	No لا	Yes نعم	No لا	Yes نعم	No لا	Yes نعم	Less than 6 hours أقل من 6 ساعات	No لا	No لا	Yes نعم	Yes نعم	Yes نعم	Yes	No لا	No لا
2020-10-10 23:38:27	Agree موافق	More than 50 أكثر من 50 سنة	Male ذكر	With family مع عائلة	College/University جامعي أو أعلى	Not working لا يعمل	More than 8000 أكثر من		No لا	No لا	Medical/Surgical face mask القناع الطبي/الجراحي	No لا	No لا	Yes نعم	Yes نعم	Every alternative day يوم بعد يوم	No لا	No لا	No لا	No لا	No لا	No لا	No لا	Yes نعم	24 hours ل24 ساعة	No لا	No لا	Yes نعم	Yes نعم	Yes نعم	Yes	Yes نعم	No لا
2020-10-11 01:44:03	Agree موافق	26 - 35	Male ذكر	With family مع عائلة	Secondary school ثانوي	Working يعمل	6000-8000	Work at office/field العمل من المكتب/الميدان	Yes نعم	No لا	Cloth or Fabric mask القناع القماشي	Sometimes أحيانا	No لا	Yes نعم	Yes نعم	Every alternative day يوم بعد يوم	No لا	Yes نعم	No لا	No لا	No لا	Yes نعم	No لا	No لا	6 - 8 hours من 6 الى 8 ساعات	No لا	No لا	No لا	Yes نعم	Yes نعم	Yes	No لا	No لا
2020-10-11 07:16:15	Agree موافق	More than 50 أكثر من 50 سنة	Male ذكر	With family مع عائلة	College/University جامعي أو أعلى	Not working لا يعمل	More than 8000 أكثر من	Work from home العمل من المنزل	Yes نعم	No لا	N 95 mask قناع N 95 الطبي	No لا	No لا	Yes نعم			No لا	No لا	No لا	No لا	No لا	Yes نعم	Yes نعم	Yes نعم	Less than 6 hours أقل من 6 ساعات	No لا	No لا	No لا	Yes نعم	No لا	No لا	No لا	No لا
2020-10-11 23:16:17	Agree موافق	26 - 35	Male ذكر	With family مع عائلة	College/University جامعي أو أعلى	Working يعمل	More than 8000 أكثر من	Work from home العمل من المنزل	Yes نعم	No لا	Medical/Surgical face mask القناع الطبي/الجراحي	No لا	Yes نعم	Yes نعم	No لا	Weekly once مرة في الاسبوع	No لا	No لا	No لا	No لا	No لا	Yes نعم	Yes نعم	Yes نعم	Less than 6 hours أقل من 6 ساعات	Yes نعم	No لا	No لا	Yes نعم	Yes نعم	No لا	Yes نعم	No لا
2020-10-12 03:58:32	Agree موافق	36 - 45	Male ذكر	Alone وحيدا	College/University جامعي أو أعلى	Working يعمل	More than 8000 أكثر من	Work from home العمل من المنزل	Yes نعم	No لا	Cloth or Fabric mask القناع القماشي	Sometimes أحيانا	No لا	No لا	Yes نعم	Weekly once مرة في الاسبوع	No لا	No لا	No لا	No لا	No لا	No لا	No لا	Yes نعم	24 hours ل24 ساعة	Yes نعم	No لا	Yes نعم	Yes نعم	Yes نعم	Yes	No لا	Yes نعم
2020-10-12 12:33:44	Agree موافق	18 - 25	Male ذكر	Alone وحيدا	Secondary school ثانوي	Working يعمل	3000-6000	Work at office/field العمل من المكتب/الميدان	Yes نعم	No لا	Medical/Surgical face mask القناع الطبي/الجراحي	Sometimes أحيانا	No لا	No لا	No لا		No لا	No لا	No لا	Yes نعم	No لا	Yes نعم	No لا	Yes نعم	8 - 12 hours من 8 الى 12 ساعة	Yes نعم	No لا	Yes نعم	Yes نعم	Yes نعم	Yes	No لا	Yes نعم
2020-10-13 04:15:11	Agree موافق	18 - 25	Male ذكر	With family مع عائلة	College/University جامعي أو أعلى	Student طالب	Less than 3000 أقل من 3000 ريال	Work from home العمل من المنزل	No لا	No لا	Medical/Surgical face mask القناع الطبي/الجراحي	Sometimes أحيانا	Yes نعم	Yes نعم	Yes نعم	If exposed to a crowded area اذا تعرضت لزحام	No لا	No لا	No لا	Yes نعم	No لا	Yes نعم	Yes نعم	Yes نعم	Less than 6 hours أقل من 6 ساعات	No لا	No لا	Yes نعم	Yes نعم	Yes نعم	Yes	Yes نعم	No لا
2020-10-13 12:04:37	Agree موافق	18 - 25	Male ذكر	With family مع عائلة	Secondary school ثانوي	Working يعمل	More than 8000 أكثر من	Work at office/field العمل من المكتب/الميدان	Yes نعم	No لا	Medical/Surgical face mask القناع الطبي/الجراحي	Sometimes أحيانا	No لا	No لا	Yes نعم	Weekly once مرة في الاسبوع	No لا	Yes نعم	No لا	Yes نعم	Yes نعم	Yes نعم	Yes نعم	Yes نعم	24 hours ل24 ساعة	No لا	No لا	No لا	Yes نعم	Yes نعم	Yes	Yes نعم	Yes نعم
2020-10-13 22:22:27	Agree موافق	18 - 25	Female انثى	With family مع عائلة	College/University جامعي أو أعلى	Working يعمل	Less than 3000 أقل من 3000 ريال	Work at office/field العمل من المكتب/الميدان	No لا	Yes نعم	Medical/Surgical face mask القناع الطبي/الجراحي	Sometimes أحيانا	No لا	Yes نعم								Yes نعم	Yes نعم	Yes نعم	6 - 8 hours من 6 الى 8 ساعات	No لا	No لا	Yes نعم	Yes نعم	Yes نعم	Yes	No لا	Yes نعم
2020-10-13 23:13:28	Agree موافق	36 - 45	Male ذكر	With family مع عائلة	College/University جامعي أو أعلى	Working يعمل	More than 8000 أكثر من	Work from home العمل من المنزل	Yes نعم	No لا	Medical/Surgical face mask القناع الطبي/الجراحي	No لا	No لا	No لا	No لا		No لا	No لا	No لا	No لا	No لا	Yes نعم	Yes نعم	Yes نعم	24 hours ل24 ساعة	Yes نعم	No لا	Yes نعم	Yes نعم	Yes نعم	Yes	Yes نعم	Yes نعم
2020-10-14 00:38:39	Agree موافق	36 - 45	Male ذكر	With family مع عائلة	College/University جامعي أو أعلى	Working يعمل	More than 8000 أكثر من	Work from home العمل من المنزل	Yes نعم	No لا	Medical/Surgical face mask القناع الطبي/الجراحي	No لا	No لا	No لا	No لا		No لا	No لا	No لا	No لا	No لا	Yes نعم	Yes نعم	Yes نعم	24 hours ل24 ساعة	Yes نعم	No لا	Yes نعم	Yes نعم	Yes نعم	Yes	Yes نعم	Yes نعم
2020-10-15 16:32:25	Agree موافق	18 - 25	Male ذكر	With family مع عائلة	College/University جامعي أو أعلى	Student طالب	Less than 3000 أقل من 3000 ريال	Work at office/field العمل من المكتب/الميدان	Yes نعم	Yes نعم	Medical/Surgical face mask القناع الطبي/الجراحي	No لا	Yes نعم	No لا				Yes نعم	No لا	Yes نعم	Yes نعم	Yes نعم	Yes نعم	No لا	Less than 6 hours أقل من 6 ساعات	Yes نعم	No لا	Yes نعم	Yes نعم	Yes نعم	Yes	Yes نعم	Yes نعم
2020-10-15 16:41:19	Agree موافق	18 - 25	Male ذكر	With family مع عائلة	Secondary school ثانوي	Student طالب	Less than 3000 أقل من 3000 ريال	Work from home العمل من المنزل	No لا	No لا	Medical/Surgical face mask القناع الطبي/الجراحي	Sometimes أحيانا	Yes نعم	Yes نعم	Yes نعم	If exposed to a crowded area اذا تعرضت لزحام	No لا	No لا	No لا	No لا	No لا	No لا	Yes نعم	Yes نعم	Less than 6 hours أقل من 6 ساعات	Yes نعم	Yes نعم	Yes نعم	Yes نعم	No لا	No لا	No لا	No لا
2020-10-15 16:42:25	Agree موافق	26 - 35	Male ذكر	With family مع عائلة	College/University جامعي أو أعلى	Working يعمل	More than 8000 أكثر من	Work at office/field العمل من المكتب/الميدان	No لا	Yes نعم	Medical/Surgical face mask القناع الطبي/الجراحي	No لا	Yes نعم	No لا				No لا	No لا		No لا	Yes نعم	Yes نعم	Yes نعم	6 - 8 hours من 6 الى 8 ساعات	No لا	No لا	No لا	Yes نعم	Yes نعم	Yes	Yes نعم	No لا
2020-10-15 16:45:17	Agree موافق	18 - 25	Male ذكر	With family مع عائلة	College/University جامعي أو أعلى	Not working لا يعمل	3000-6000	Work from home العمل من المنزل	No لا	No لا	Medical/Surgical face mask القناع الطبي/الجراحي	No لا	Yes نعم	Yes نعم	No لا		No لا	Yes نعم	No لا	No لا	Yes نعم	Yes نعم	Yes نعم	Yes نعم	Less than 6 hours أقل من 6 ساعات	Yes نعم	No لا	No لا	Yes نعم	Yes نعم	Yes	No لا	Yes نعم
2020-10-15 16:45:25	Agree موافق	18 - 25	Male ذكر	With family مع عائلة	College/University جامعي أو أعلى	Student طالب	Less than 3000 أقل من 3000 ريال	Work from home العمل من المنزل	No لا	No لا	N 95 mask قناع N 95 الطبي	No لا	No لا	Yes نعم	No لا	If exposed to a crowded area اذا تعرضت لزحام	No لا	No لا	No لا	No لا	No لا	Yes نعم	Yes نعم	Yes نعم	Less than 6 hours أقل من 6 ساعات	Yes نعم	No لا	Yes نعم	Yes نعم	Yes نعم	Yes	Yes نعم	Yes نعم
2020-10-15 16:50:29	Agree موافق	26 - 35	Male ذكر	With family مع عائلة	College/University جامعي أو أعلى	Not working لا يعمل	Less than 3000 أقل من 3000 ريال		No لا	No لا	Medical/Surgical face mask القناع الطبي/الجراحي	No لا		No لا			No لا	No لا	No لا	No لا	No لا	Yes نعم	Yes نعم	No لا	Less than 6 hours أقل من 6 ساعات	No لا	No لا	Yes نعم	Yes نعم	Yes نعم	Yes	Yes نعم	No لا
2020-10-15 17:13:11	Agree موافق	18 - 25	Male ذكر	With family مع عائلة	College/University جامعي أو أعلى	Student طالب	Less than 3000 أقل من 3000 ريال	Work at office/field العمل من المكتب/الميدان	Yes نعم	Yes نعم	Medical/Surgical face mask القناع الطبي/الجراحي	No لا	Yes نعم	No لا				Yes نعم	No لا	Yes نعم	Yes نعم	Yes نعم	Yes نعم	No لا	Less than 6 hours أقل من 6 ساعات	Yes نعم	No لا	Yes نعم	Yes نعم	Yes نعم	Yes	Yes نعم	Yes نعم
2020-10-16 02:41:02	Agree موافق	36 - 45	Male ذكر	Alone وحيدا	College/University جامعي أو أعلى	Working يعمل	More than 8000 أكثر من	Work from home العمل من المنزل	Yes نعم	No لا	Cloth or Fabric mask القناع القماشي	Sometimes أحيانا	No لا	No لا	Yes نعم	Weekly once مرة في الاسبوع	No لا	No لا	No لا	No لا	No لا	No لا	No لا	Yes نعم	24 hours ل24 ساعة	Yes نعم	No لا	Yes نعم	Yes نعم	Yes نعم	Yes	No لا	Yes نعم
2020-10-16 07:03:46	Agree موافق	18 - 25	Male ذكر	With family مع عائلة	College/University جامعي أو أعلى	Not working لا يعمل	Less than 3000 أقل من 3000 ريال	Work from home العمل من المنزل	No لا	No لا	Medical/Surgical face mask القناع الطبي/الجراحي	Sometimes أحيانا	No لا	Yes نعم			No لا	No لا	No لا	No لا	No لا	No لا	Yes نعم	Yes نعم	Less than 6 hours أقل من 6 ساعات	No لا	No لا	No لا	Yes نعم	Yes نعم	Yes	Yes نعم	Yes نعم
2020-10-29 09:27:29	Agree موافق	18 - 25	Male ذكر	With family مع عائلة	College/University جامعي أو أعلى	Student طالب	Less than 3000 أقل من 3000 ريال	Work from home العمل من المنزل	No لا	Yes نعم	Cloth or Fabric mask القناع القماشي	Sometimes أحيانا	Yes نعم	Yes نعم	No لا	Every alternative day يوم بعد يوم	No لا	No لا	No لا	No لا	No لا	Yes نعم	No لا	Yes نعم	Less than 6 hours أقل من 6 ساعات	Yes نعم	No لا	Yes نعم	No لا	Yes نعم	Yes	Yes نعم	Yes نعم
